# Supplementary material for: Photoactivable malachite green-based alkynylplatinum(ii) 2,6-bis(N-alkylbenzimidazol-2-yl)pyridine complexes
Source: Royal Society of Chemistry journal article supplement (doi:10.1039/d4cc03558e), 2024-01-01
Supplement: d4cc03558e1.pdf [file d4cc03558e1.pdf]

## Electronic Supplementary Information

### **Photoactivable Malachite Green-Based Alkynylplatinum(II) 2,6-Bis(*N*-alkylbenzimidazol-2-yl)pyridine Complexes**

Andy Shun-Hoi Cheung, Ming-Yi Leung, Tony Ho-Ching Fung and Vivian Wing-Wah Yam\*

Institute of Molecular Functional Materials and Department of Chemistry, The University of  
Hong Kong, Pokfulam Road, Hong Kong, P. R. China

\*Corresponding author: [wvyam@hku.hk](mailto:wvyam@hku.hk)

## Experimental

### Materials and Reagents

Acetonitrile (MeCN) (ACS spectrophotometric grade) was purchased from Sigma-Aldrich Co. Ltd. [D<sub>6</sub>]-Acetone and [D<sub>3</sub>]-acetonitrile were purchased from Cambridge Isotope Laboratories, Inc. Tetra-*n*-butylammonium fluoride solution (1.0 M in THF) was purchased from J & K Scientific Ltd. 4,4'-bis(dimethylamino)-benzophenone and 1,7-octadiyne were purchased from Sigma-Aldrich Chemical Co. ((4-Bromophenyl)ethynyl)tri-*iso*-propylsilane<sup>1</sup> and 1,8-bis(4-bromophenyl)octa-1,7-diyne<sup>2</sup> were synthesized and purified according to the procedures reported previously. All other commercially available reagents were of analytical grade and were used as received. All solvents were purified by the Innovative Technology, Inc. PureSolv MD 5 Solvent Purification System before use. All amines were distilled over sodium hydroxide and stored over sodium hydroxide before use. All reactions were performed under inert and anhydrous conditions using standard Schlenk techniques unless specified otherwise.

**Caution:** *The synthesis of malachite green derivatives involved the use of potassium cyanide which is highly toxic and should be handled with great caution. The excess and/or residue potassium cyanide should be quenched by excess aqueous ammonium iron(II) sulphate solution. The formation of a dark blue precipitate, which is the Prussian Blue, would indicate the complete quenching of potassium cyanide. Also, any acid and/or acidic vapour should be avoided when performing the reaction in the fumehood, including both the setting up and working up processes.*

## Physical Measurements and Instrumentation

$^1\text{H}$  NMR spectra were recorded on a Bruker AVANCE 300 (300 MHz) or a Bruker AVANCE 500 (500 MHz) NMR spectrometers with chemical shifts relative to tetramethylsilane ( $\text{Me}_4\text{Si}$ ). Electron impact (EI) mass spectra were recorded on a Thermo Scientific DFS High Resolution Magnetic Sector mass spectrometer. High-resolution electrospray ionization (ESI) mass spectra were recorded on a Bruker maXisII high-resolution LC-QTOF mass spectrometer. All elemental analyses were performed on a Flash EA 1112 elemental analyser by the Institute of Chemistry at the Chinese Academy of Sciences in Beijing. IR spectra were obtained in the solution state on a IRAffinity-1 Fourier transform infrared spectrophotometer ( $4000\text{--}500\text{ cm}^{-1}$ ). UV–Visible absorption spectra were obtained by using a Varian Cary 50 UV/Vis spectrophotometer. Photoirradiation was performed using a UVGO 254-nm 12 W UVC LED lamp. The UV–visible spectral changes upon UV irradiation was monitored by an Agilent Cary 8454 diode array spectrophotometer. Transmission electron microscopy (TEM) experiments were performed on a Philips CM100 transmission electron microscope. Scanning electron microscopy (SEM) experiments were performed on a Leo 1530 Field-Emission-Gun scanning electron microscope. The selected area electron diffraction (SAED) experiments were performed on a FEI Tecnai G2 20 S-TWIN transmission electron microscope with an accelerating voltage of 200 kV. All carbon-coated copper grids were pre-treated with a PELCO easiGlow Glow Discharge Cleaning System. Samples were prepared by dropping a few drops of sample solution onto the grids and dried by slow evaporation of the solvents. X-Ray diffraction data were collected on Bruker D8 ADVANCE Powder X-ray Diffractometer in Bragg-Brentano ( $\theta/2\theta$ ) reflection mode with a graphite monochromatized  $\text{Cu-K}_\alpha$  radiation ( $\lambda = 1.54178\text{ \AA}$ ) and nickel filter.

## Computational Details

Gaussian 09 software package<sup>3</sup> was adopted for the calculations. Density functional theory (DFT) with the M06 functional,<sup>4</sup> which is suggested for investigations of transition metal thermochemistry and for properly considering non-covalent interactions,<sup>4,5</sup> was used to optimize the ground state ( $S_0$ ) geometries of the model complexes of **1** (**1'** and **1''**). **1'** and **1''** were investigated in conjunction with the solvation model density (SMD) continuum method<sup>6</sup> using acetonitrile (MeCN) as the solvent. On the basis of the optimized  $S_0$  geometries, time-dependent DFT (TDDFT)<sup>7-9</sup> calculations at the same level associated with CPCM (MeCN) were performed to compute the singlet-singlet transitions. Non-Covalent Interactions (NCI) isosurfaces of the dimers of **1'** and **1''** were obtained with the NCIPLOT code,<sup>10,11</sup> which was based on the electron density and its gradient, and the results were visualized with the Visual Molecular Dynamic (VMD) program.<sup>12</sup> Vibrational frequencies were subsequently calculated at the same level of theory for the optimized geometries to verify that each was a minimum (NIMAG = 0) on the potential energy surface. The Stuttgart effective core potentials (ECPs) and the associated basis set were used to describe platinum<sup>13</sup> with two f-type polarization functions ( $\zeta = 0.70$  and  $0.14$ ),<sup>14</sup> whereas the 6-31G(d,p) basis set was employed to describe all other atoms.<sup>15-17</sup> The DFT calculations were performed with a pruned (99,590) grid for numerical integration.

The TDDFT calculations show that the low-energy absorption band at 453 nm corresponds to the HOMO-2 $\rightarrow$ LUMO transition in **1'**. The HOMO-2 of **1'** corresponds to the  $\pi$  orbitals localized on the malachite green (MG) leucocyanide and the d-orbitals of the Pt(II) centre, while the LUMO of **1'** corresponds to the  $\pi^*$  orbitals localized on the bzimpy ligand. Therefore, the low-energy absorption band of **1'** can be assigned as the metal-to-ligand charge transfer (MLCT) [ $d\pi(\text{Pt})\rightarrow\pi^*(\text{bzimpy})$ ] and ligand-to-ligand charge transfer (LLCT) [ $\pi(\text{MG})\rightarrow\pi^*(\text{bzimpy})$ ] transitions. These calculations are in line with the assignments in the electronic absorption study of **1**. On the other hand, the low-energy absorption band at 528 nm

in **1''** corresponds to the HOMO→LUMO transition. The HOMO of **1''** corresponds to the  $\pi$  orbitals mainly localized on the ionic form of MG moiety, while the LUMO corresponds to the  $\pi^*$  orbitals localized on the ionic form of MG moiety, and the alkynyl and bzimpy ligands. Therefore, the low-energy absorption band of **1''** can be assigned as the intraligand (IL) [ $\pi(\text{MG})\rightarrow\pi^*(\text{MG})$ ] transition, with some mixing of ligand-to-ligand charge transfer (LLCT) [ $\pi(\text{MG})\rightarrow\pi^*(\text{bzimpy})$ ] transitions. Due to the failure of obtaining the pure photoionized product of **1**, the results from the computational studies could not be directly compared. The first ten singlet ( $S_n$ ) excited states of **1'** and **1''** have been computed with the TDDFT/CPCM (MeCN) method (Tables S2–S3). Selected frontier molecular orbitals of **1'** and **1''** as well as the simulated electronic absorption spectra based on the TDDFT results are summarized in Fig. S23–S25.

## Synthetic Procedures

**TIPS-C≡C-MG-CN (L1).** It was prepared according to a modification of the procedure reported for the synthesis of 2,2'-bis(4-(dimethylamino)phenyl)-2-(4-(2-hydroxyethoxy)phenyl)acetonitrile,<sup>18</sup> except that ((4-bromophenyl)ethynyl) triisopropylsilane (1.68 g, 4.99 mmol) was used in place of 2-(4-bromophenoxy)ethanol. Yield: 0.681 g, 1.27 mmol; 25.5 %. <sup>1</sup>H NMR (300 MHz, [D<sub>6</sub>]-acetone, 298 K, δ/ppm): δ 1.15 (s, 21H, -Si(CH(CH<sub>3</sub>)<sub>2</sub>)<sub>3</sub>), 2.96 (s, 12H, -N-(CH<sub>3</sub>)<sub>2</sub>), 6.74 (d, *J* = 8.7 Hz, 4H, phenyl), 6.99 (d, *J* = 8.7 Hz, 4H, phenyl), 7.23 (d, *J* = 8.2 Hz, 2H, phenyl), 7.54 (d, *J* = 8.2 Hz, 2H, phenyl). HRMS (Positive ESI): calcd for C<sub>35</sub>H<sub>45</sub>N<sub>3</sub>Si, *m/z* 536.3456; found: 536.3453 [M+H]<sup>+</sup>.

**Br-C<sub>6</sub>H<sub>4</sub>-(C≡C-(CH<sub>2</sub>)<sub>4</sub>-C≡C-MG-CN)-4 (L2).** It was prepared according to a modification of the procedure reported for the synthesis of 2,2'-bis(4-(dimethylamino)phenyl)-2-(4-(2-hydroxyethoxy)phenyl)acetonitrile,<sup>18</sup> except that 1,8-bis(4-bromophenyl)octa-1,7-diyne (2.99 g, 7.18 mmol) was used in place of 2-(4-bromophenoxy)ethanol. Yield: 0.342 g, 0.556 mmol; 7.74 %. <sup>1</sup>H NMR (300 MHz, [D<sub>6</sub>]-acetone, 298 K, δ/ppm): δ 1.78 (s, 4H, -CH<sub>2</sub>-), 2.50 (s, 4H, -CH<sub>2</sub>-), 2.96 (s, 12H, -N-(CH<sub>3</sub>)<sub>2</sub>), 6.73 (d, *J* = 8.7 Hz, 4H, phenyl), 6.98 (d, *J* = 8.7 Hz, 4H, phenyl), 7.18 (d, *J* = 8.0 Hz, 2H, phenyl), 7.33 (d, *J* = 8.0 Hz, 2H, phenyl), 7.43 (d, *J* = 8.0 Hz, 2H, phenyl), 7.51 (d, *J* = 8.0 Hz, 2H, phenyl). HRMS (Positive EI): calcd for C<sub>38</sub>H<sub>36</sub>N<sub>3</sub>Br, *m/z* 613.2165; found: 613.2097 [M]<sup>+</sup>.

**[Pt{bzimpy(C<sub>10</sub>H<sub>21</sub>)<sub>2</sub>}{C≡C-MG-CN}]PF<sub>6</sub> (1).** To a stirred solution of [Pt{bzimpy(C<sub>10</sub>H<sub>21</sub>)<sub>2</sub>}Cl]PF<sub>6</sub> (150 mg, 0.155 mmol) and TIPS-C≡C-MG-CN (L1) (100 mg, 0.187 mmol) in dichloromethane (20 mL) was added a catalytic amount of copper(I) iodide (10 mg) and triethylamine (2 mL) at 0 °C. Subsequently, tetra-*n*-butylammonium fluoride (2 mL, excess) in THF solution was added slowly. The reaction was allowed to stir overnight. After removal of solvent, the crude product was purified by slow diffusion of diethyl ether vapor into

the concentrated dichloromethane solution to give the products of complex **1** as an orange solid. Yield: 85.1 mg, 0.0650 mmol; 41.9 %.  $^1\text{H NMR}$  (500 MHz,  $[\text{D}_6]$ -acetone, 298 K,  $\delta/\text{ppm}$ ):  $\delta$  0.84 (t,  $J = 7.0$  Hz, 6H,  $-\text{CH}_3$ ), 1.23–1.28 (m, 24H,  $-\text{CH}_2-$ ), 1.32–1.35 (m, 4H,  $-\text{CH}_2-$ ), 1.48–1.51 (m, 4H,  $-\text{CH}_2-$ ), 3.00 (s, 12H,  $-\text{N}-(\text{CH}_3)_2$ ), 4.81–4.85 (m, 4H,  $-\text{N}-\text{CH}_2-$ ), 6.82 (d,  $J = 8.8$  Hz, 4H, phenyl), 7.10 (d,  $J = 8.8$  Hz, 4H, phenyl), 7.33 (d,  $J = 8.5$  Hz, 2H, benzimidazolyl), 7.59–7.63 (m, 4H, phenyl and benzimidazolyl), 7.69 (t,  $J = 7.5$  Hz, 2H, benzimidazolyl), 7.77 (d,  $J = 8.5$  Hz, 2H, phenyl), 8.53–8.59 (m, 3H, pyridine), 8.62 (d,  $J = 8.5$  Hz, 2H, benzimidazolyl). HRMS (Positive ESI): calcd for  $\text{C}_{65}\text{H}_{77}\text{N}_8\text{Pt}$ ,  $m/z$  1165.5933; found: 1165.5923  $[\text{M}-\text{PF}_6]^+$ . Elemental analysis calcd (%) for  $\text{C}_{65}\text{H}_{77}\text{F}_6\text{N}_8\text{PPt}\cdot 0.5\text{CH}_2\text{Cl}_2$ : C, 58.15; H, 5.81; N, 8.28; found: C, 58.37; H, 5.85; N, 8.59.

**[Pt{bzimpy(C<sub>10</sub>H<sub>21</sub>)<sub>2</sub>}{C≡C-C<sub>6</sub>H<sub>4</sub>-(C≡C-(CH<sub>2</sub>)<sub>4</sub>-C≡C-MG-CN)-4}]PF<sub>6</sub> (2).** To a degassed solution of Br-C<sub>6</sub>H<sub>4</sub>-(C≡C-(CH<sub>2</sub>)<sub>4</sub>-C≡C-MG-CN)-4 (L2) (0.341 g, 0.554 mmol) in diisopropylamine (15 mL) was added [Pd(PPh<sub>3</sub>)<sub>2</sub>Cl<sub>2</sub>] (100 mg, 0.142 mmol), copper(I) iodide (100 mg, 0.523 mmol) and (triisopropylsilyl)acetylene (2.10 mL, 9.36 mmol). The reaction mixture was allowed to reflux for 2 hours. After cooling to room temperature, the reaction mixture was filtered and the solvent was removed in vacuo. To the stirred solution of this crude product in dichloromethane (20 mL) was added [Pt{bzimpy(C<sub>10</sub>H<sub>21</sub>)<sub>2</sub>}Cl]PF<sub>6</sub> (150 mg, 0.155 mmol), a catalytic amount of copper(I) iodide (10 mg) and triethylamine (2 mL) at 0 °C. Subsequently, tetra-*n*-butylammonium fluoride (2 mL, excess) in THF solution was added slowly. The reaction was allowed to stir overnight. After removal of solvent, the crude product was purified by slow diffusion of diethyl ether vapor into the concentrated dichloromethane solution to give the products of complex **2** as an orange solid. Yield: 38.3 mg, 0.0257 mmol; 16.6 %.  $^1\text{H NMR}$  (500 MHz,  $[\text{D}_6]$ -acetone, 298 K,  $\delta/\text{ppm}$ ):  $\delta$  0.85 (t,  $J = 7.0$  Hz, 6H,  $-\text{CH}_3$ ), 1.24–1.30 (m, 24H,  $-\text{CH}_2-$ ), 1.43–1.49 (m, 4H,  $-\text{CH}_2-$ ), 1.86–1.87 (m, 4H,  $-\text{CH}_2-$ ), 1.97–2.01 (m, 4H,  $-\text{CH}_2-$ ), 2.58–2.61 (m, 4H,  $-\text{CH}_2-$ ), 2.93 (s, 12H,  $-\text{N}-(\text{CH}_3)_2$ ), 4.69–4.71

(m, 4H, -N-CH<sub>2</sub>-), 6.72 (d,  $J = 8.5$  Hz, 4H, phenyl), 6.98 (d,  $J = 8.5$  Hz, 4H, phenyl), 7.21 (d,  $J = 8.0$  Hz, 2H, phenyl), 7.43–7.51 (m, 6H, phenyl), 7.54 (t,  $J = 7.5$  Hz, 2H, benzimidazolyl), 7.60 (t,  $J = 7.5$  Hz, 2H, benzimidazolyl), 7.65 (d,  $J = 8.0$  Hz, 2H, benzimidazolyl), 8.40–8.44 (m, 4H, benzimidazolyl and pyridine), 8.53 (t,  $J = 8.0$  Hz, 1H, pyridine). HRMS (Positive ESI): calcd for C<sub>79</sub>H<sub>89</sub>N<sub>8</sub>Pt,  $m/z$  1345.6875; found: 1345.6849 [M-PF<sub>6</sub>]<sup>+</sup>. Elemental analysis calcd (%) for C<sub>79</sub>H<sub>89</sub>F<sub>6</sub>N<sub>8</sub>PPt: C, 63.65; H, 6.02; N, 7.52; found: C, 63.23; H, 6.00; N, 7.51.



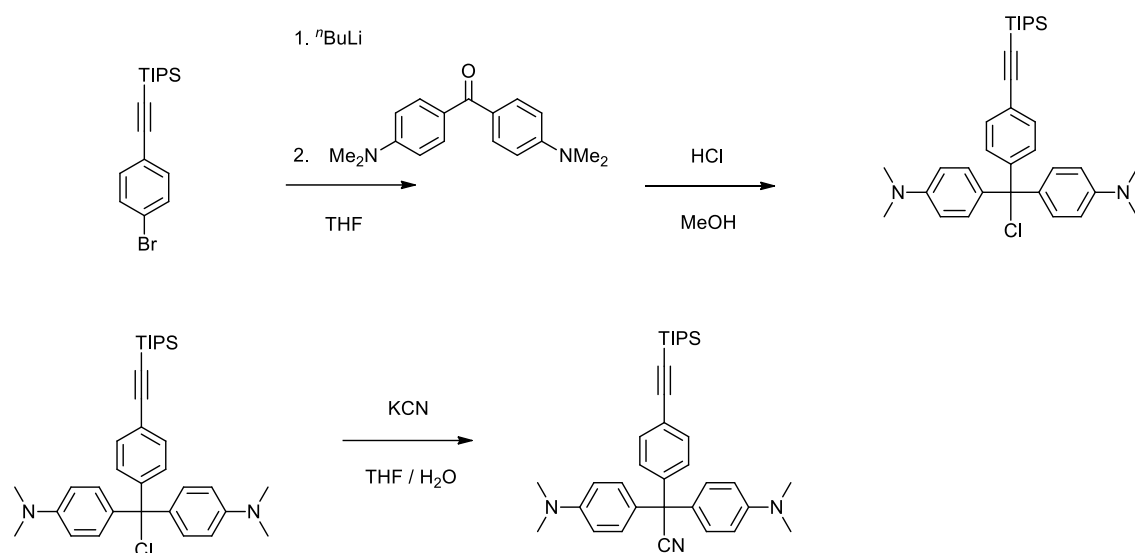

**Scheme S1** Synthetic route for **L1**.

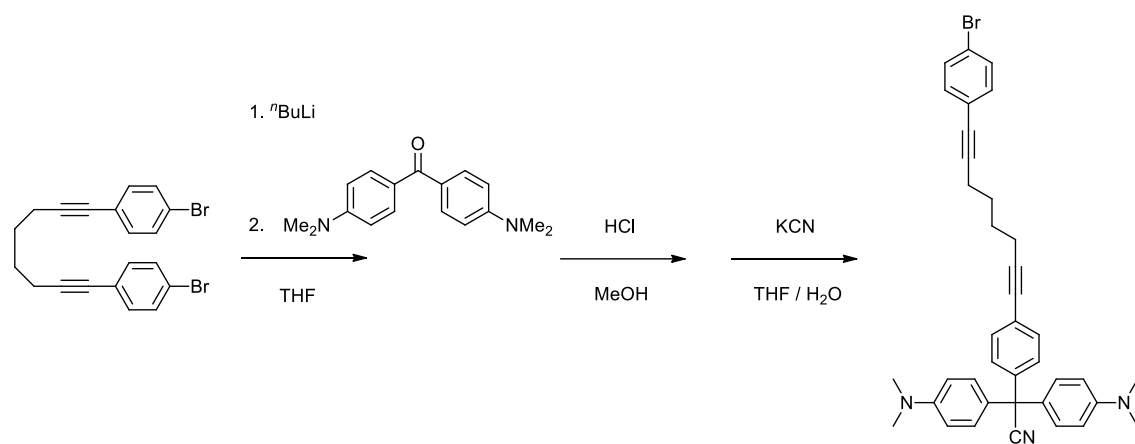

**Scheme S2** Synthetic route for **L2**.

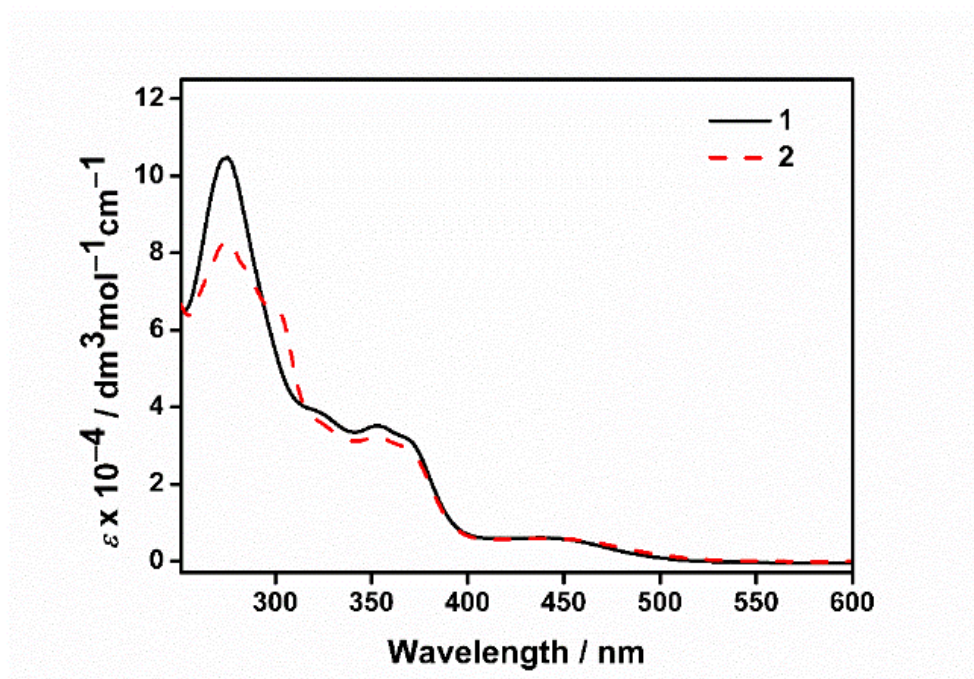

**Fig. S1** Electronic absorption spectra of **1** and **2** in MeCN solutions at 298 K.

**Table S1** Photophysical data of **1** and **2** in MeCN at 298 K

| Complex  | Absorption                                                                                                  |
|----------|-------------------------------------------------------------------------------------------------------------|
|          | $\lambda_{\text{max}} / \text{nm}$ ( $\epsilon_{\text{max}} / \text{dm}^3 \text{mol}^{-1} \text{cm}^{-1}$ ) |
| <b>1</b> | 275 (105000), 330sh (36300), 354 (35200), 370sh (31300), 452 (5670)                                         |
| <b>2</b> | 274 (83400), 305 (61300), 350 (32100), 454 (5720)                                                           |

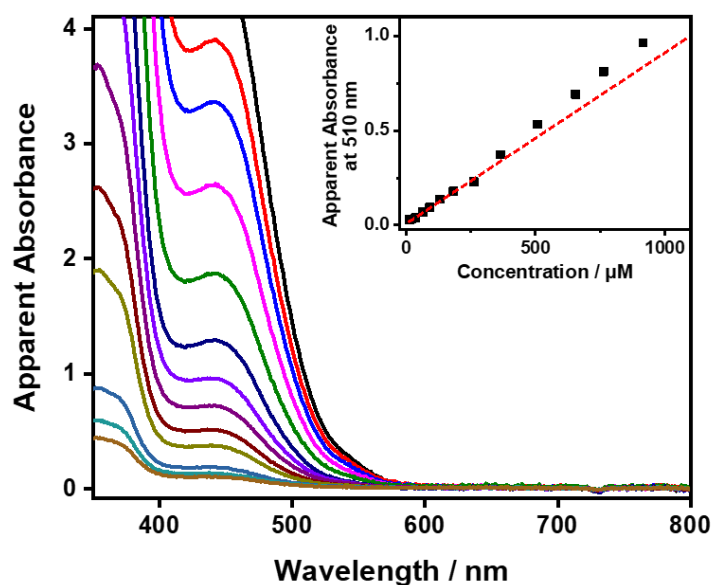

**Fig. S2** Concentration-dependent UV-visible absorption spectra of **1** in MeCN in the concentration range of  $9.15 \times 10^{-4}$  to  $1.30 \times 10^{-5}$  M. Inset: Plot of apparent absorbance against concentration, monitored at 510 nm. The apparent absorbance values were obtained by correcting to 1-cm pathlength equivalence.

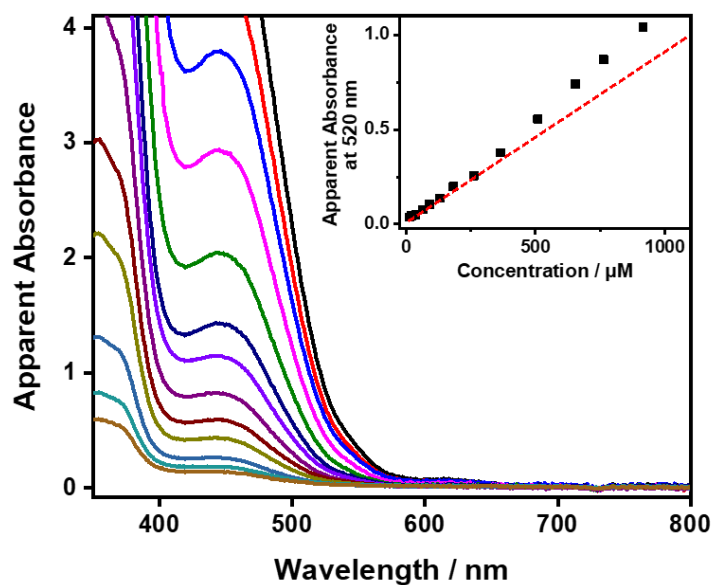

**Fig. S3** Concentration-dependent UV-visible absorption spectra of **2** in MeCN in the concentration range of  $8.99 \times 10^{-4}$  to  $1.28 \times 10^{-5}$  M. Inset: Plot of apparent absorbance against concentration, monitored at 520 nm. The apparent absorbance values were obtained by correcting to 1-cm pathlength equivalence.

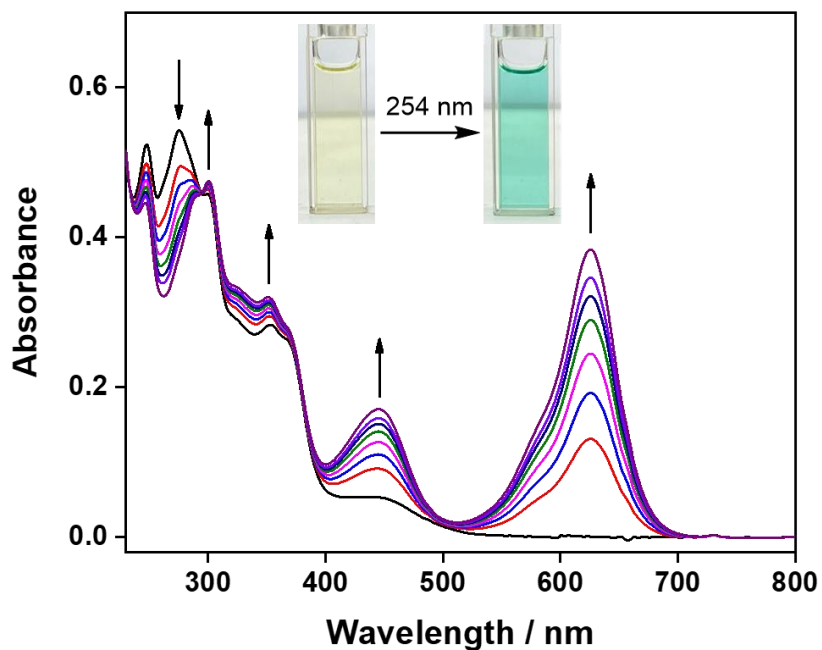

**Fig. S4** UV-Visible spectral changes of **2** in MeCN upon photo-irradiation at 254 nm ( $[2] = 8.73 \times 10^{-6}$  M). Spectra were taken at time intervals of 10 s. Inset shows the colour change of the solution.

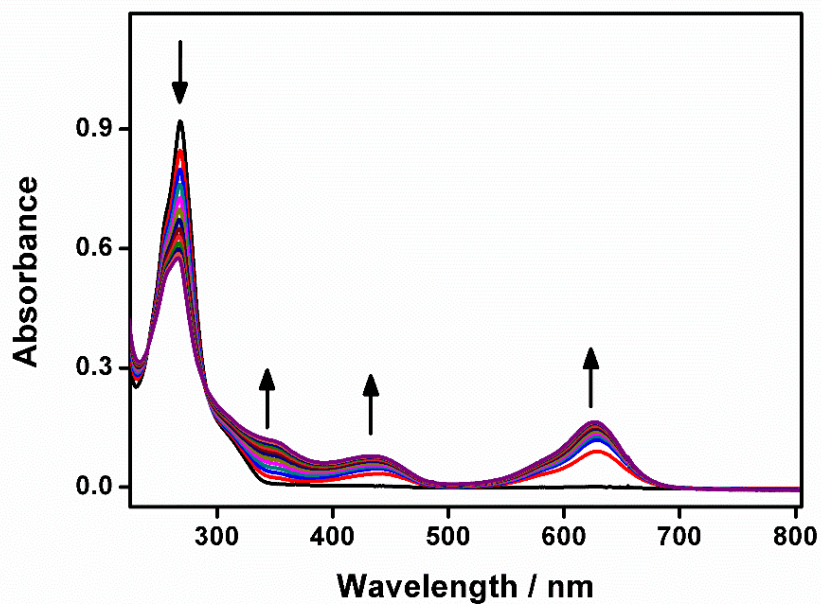

**Fig. S5** UV-Visible absorption spectral traces of **L1** in MeCN solution at 298 K upon photo-irradiation at 254 nm ( $[L1] = 2.23 \times 10^{-5}$  M). Spectra were taken at time intervals of 60 s.

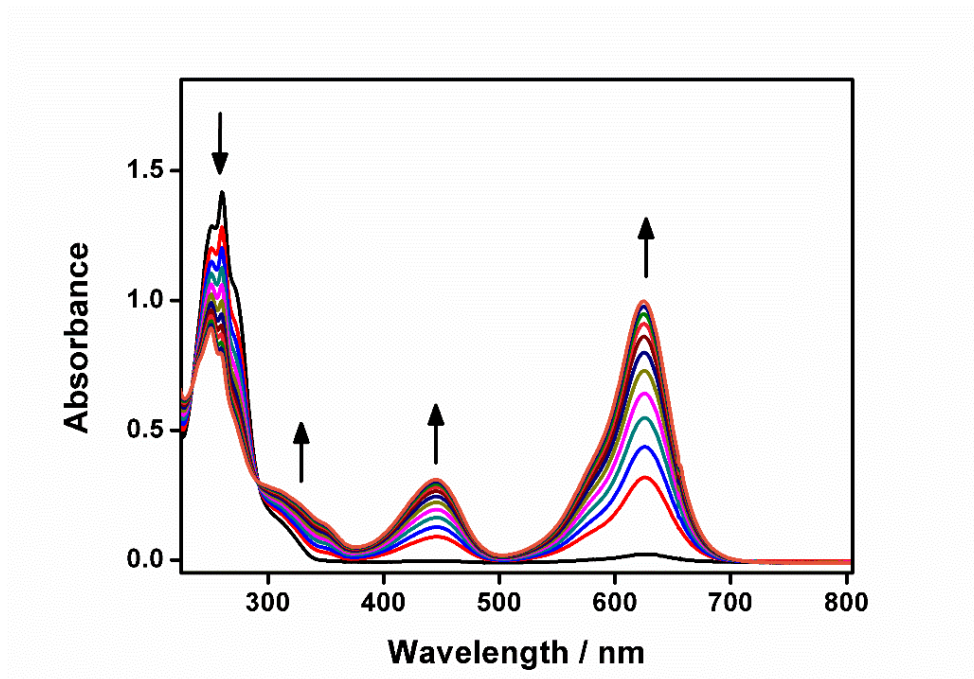

**Fig. S6** UV-Visible absorption spectral traces of **L2** in MeCN solution at 298 K upon photoirradiation at 254 nm ( $[\mathbf{L2}] = 2.58 \times 10^{-5}$  M). Spectra were taken at time intervals of 10 s.

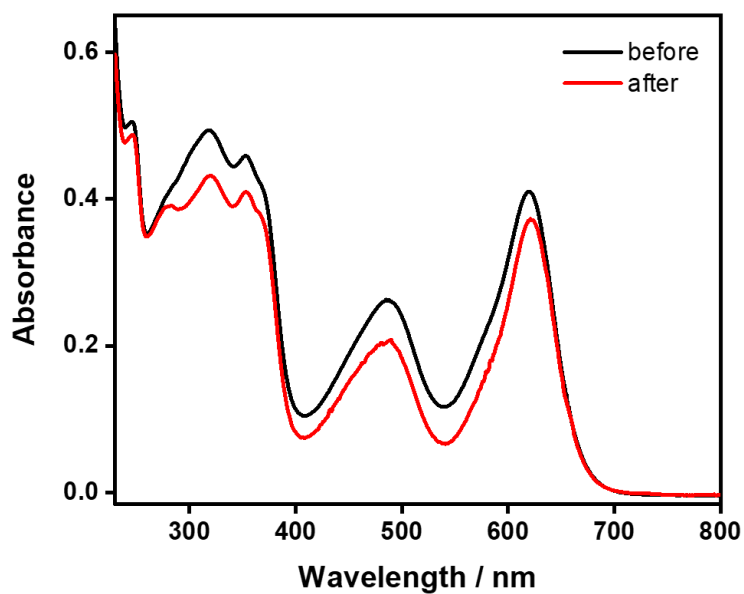

**Fig. S7** Electronic absorption spectra of **1** in MeCN before and after standing the photoirradiated solution for 48 hours in the dark at ambient conditions.

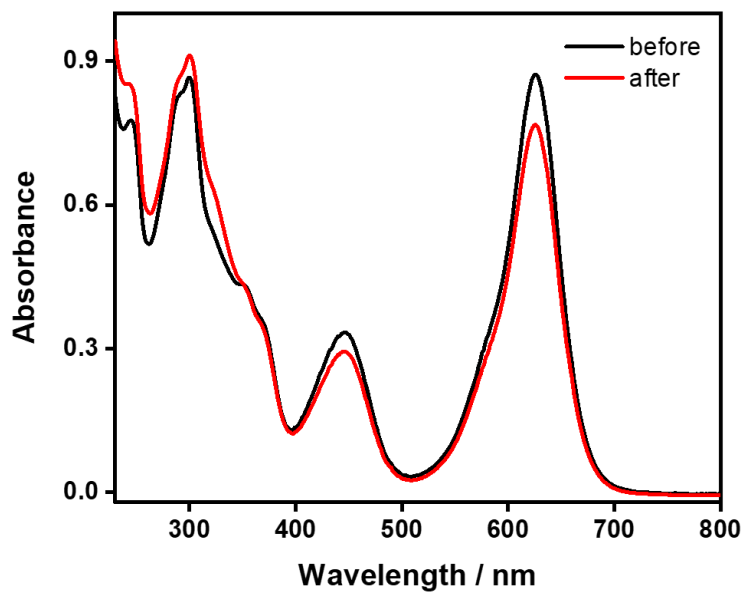

**Fig. S8** Electronic absorption spectra of **2** in MeCN before and after standing the photo-irradiated solution for 48 hours in the dark at ambient conditions.

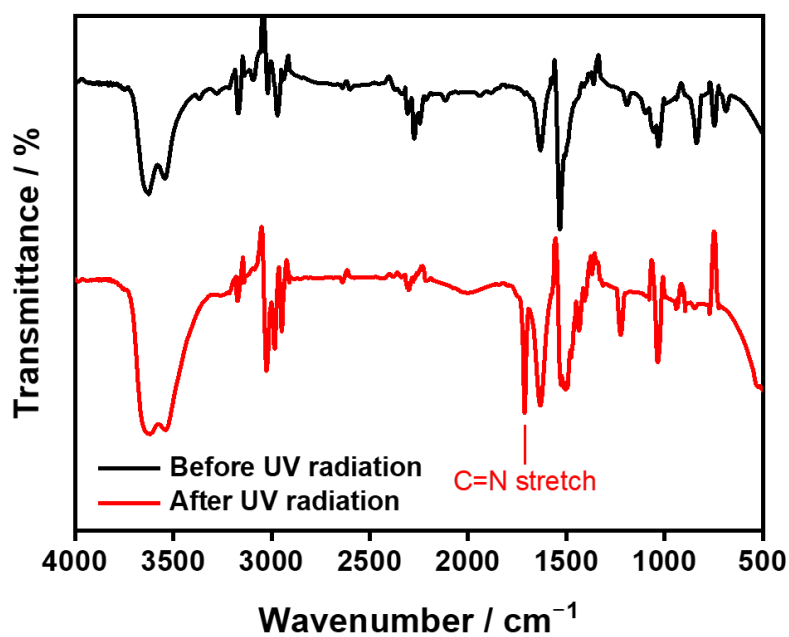

**Fig. S9** FT-IR spectra of **2** before and after photo-irradiation at 254 nm for 2 min.

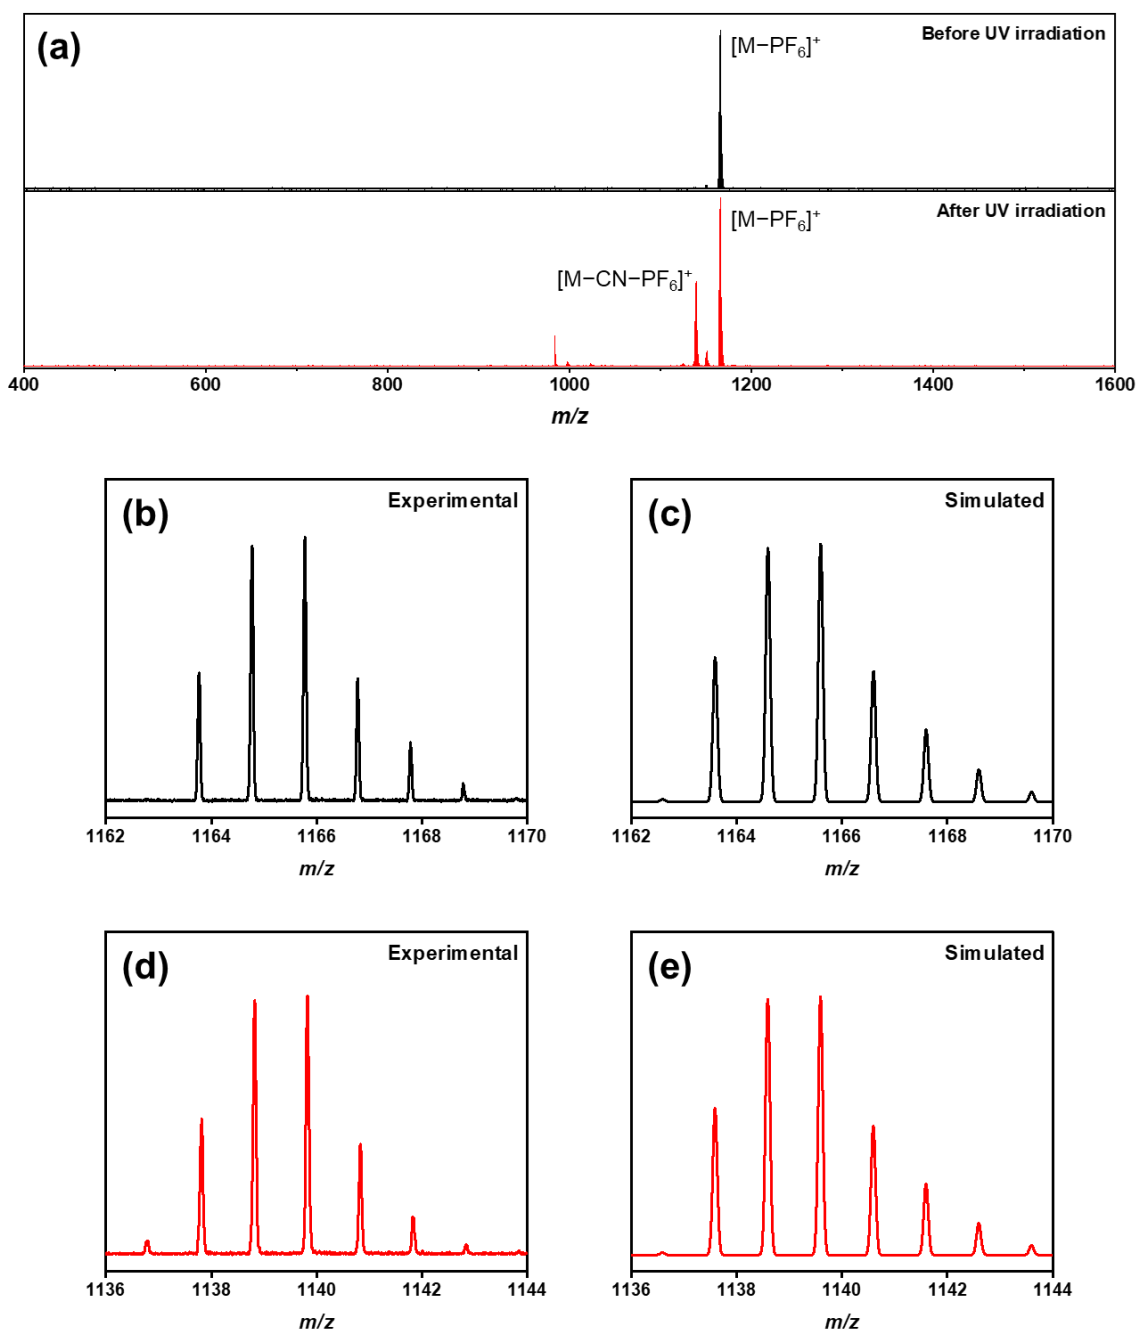

**Fig. S10** (a) MALDI mass spectra of **1** before and after UV irradiation at 254 nm. (b) Expanded ion cluster of **1** corresponding to  $[M-PF_6]^+$ , and (c) its simulated isotopic pattern. (d) Expanded ion cluster of **1** corresponding to  $[M-CN-PF_6]^+$ , and (e) its simulated isotopic pattern.

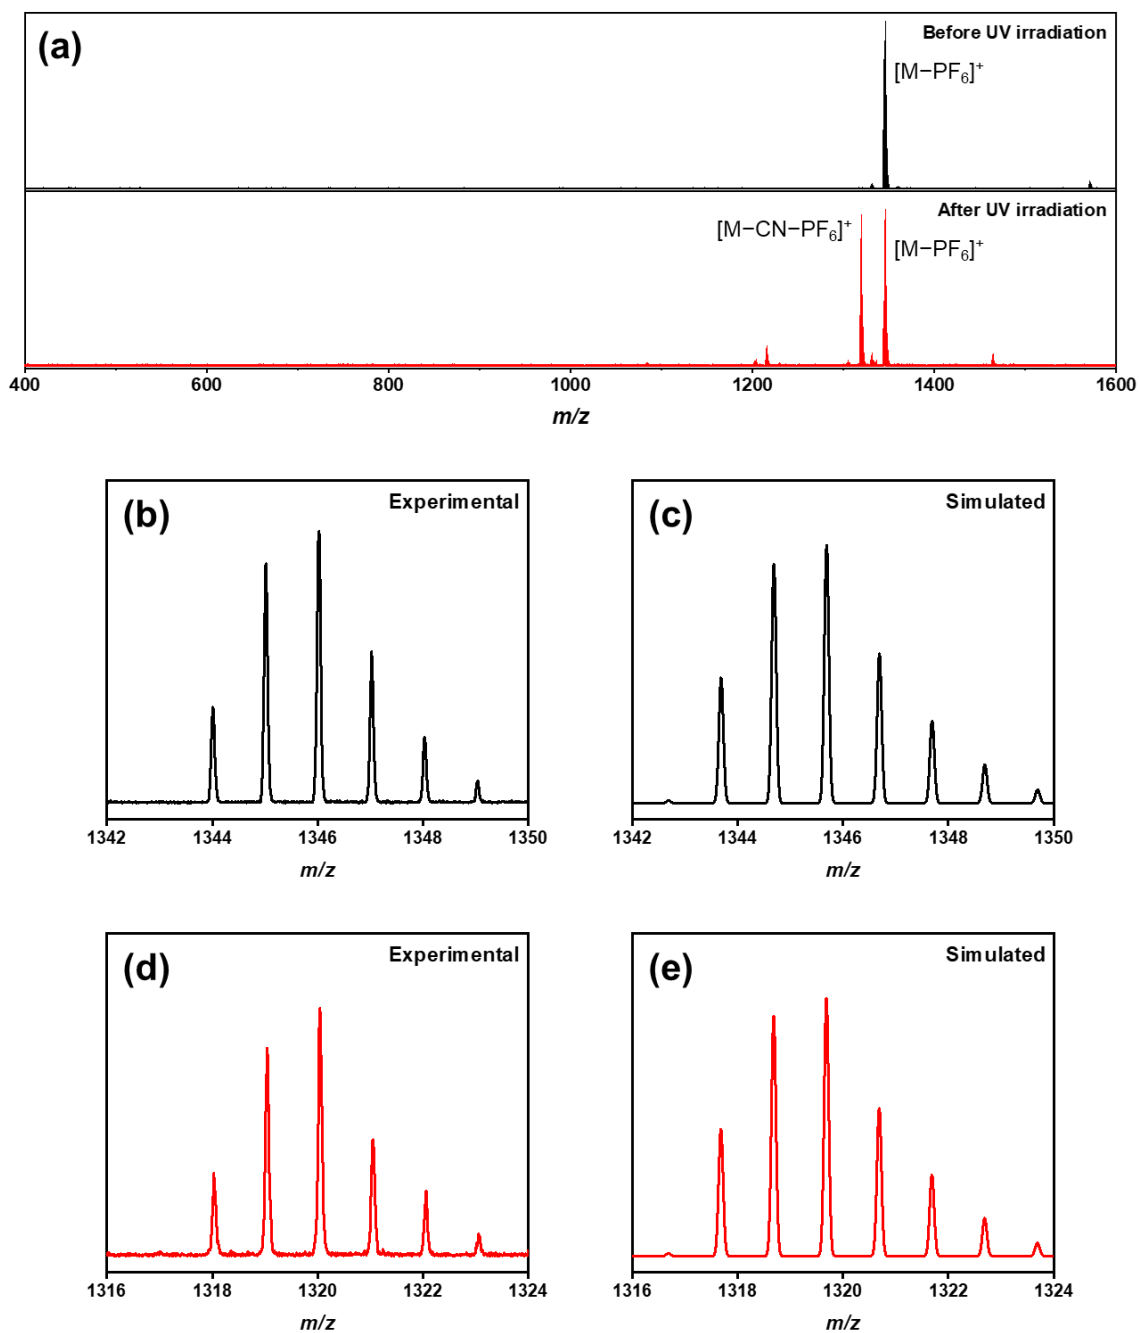

**Fig. S11** (a) MALDI mass spectra of **2** before and after UV irradiation at 254 nm. (b) Expanded ion cluster of **2** corresponding to  $[M-PF_6]^+$ , and (c) its simulated isotopic pattern. (d) Expanded ion cluster of **2** corresponding to  $[M-CN-PF_6]^+$ , and (e) its simulated isotopic pattern.



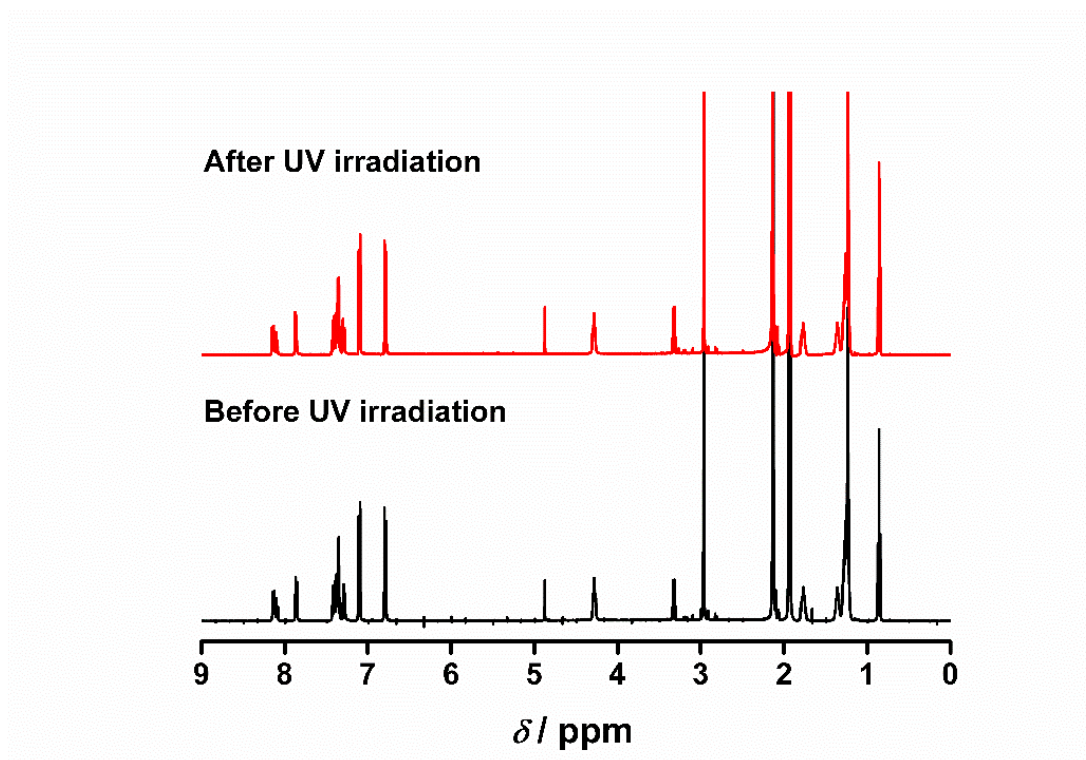

**Fig. S12** <sup>1</sup>H NMR spectra of **1** before and after photo-irradiation at 254 nm in [D<sub>3</sub>]-MeCN at 298 K ([**1**] = *ca.*  $1 \times 10^{-4}$  M).

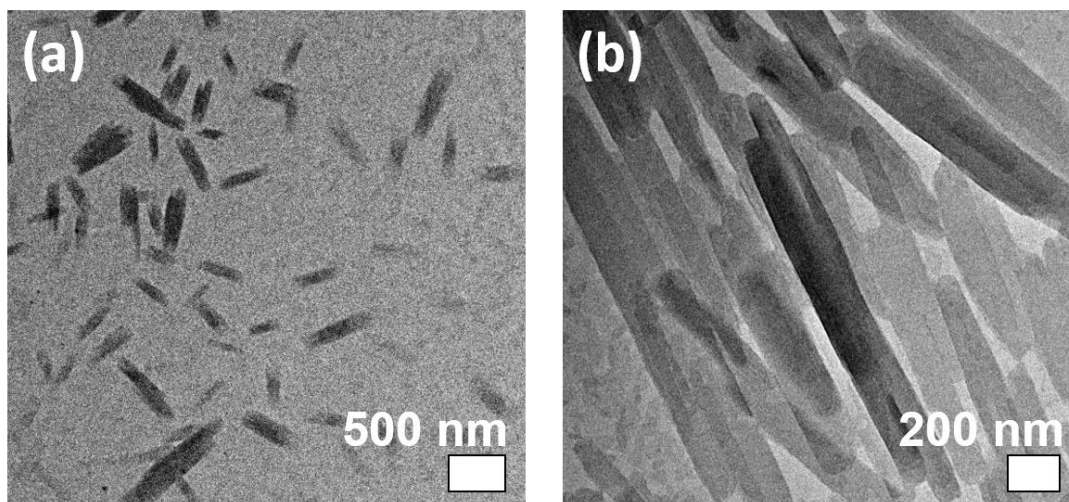

**Fig. S13** TEM images of the aggregates prepared from a MeCN solution of **1** (a) before and (b) after UV irradiation ( $[1] = ca. 1 \times 10^{-4} M$ ).

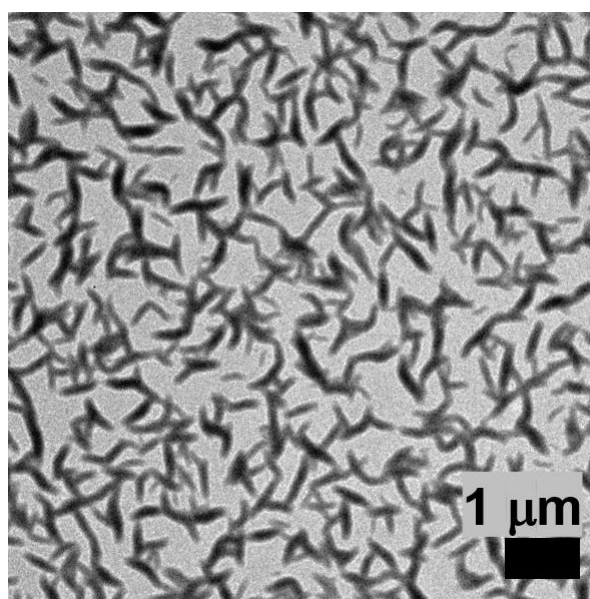

**Fig. S14** TEM image of the aggregates prepared from a MeCN solution of **2** before UV irradiation ( $[2] = ca. 1 \times 10^{-3} M$ ).

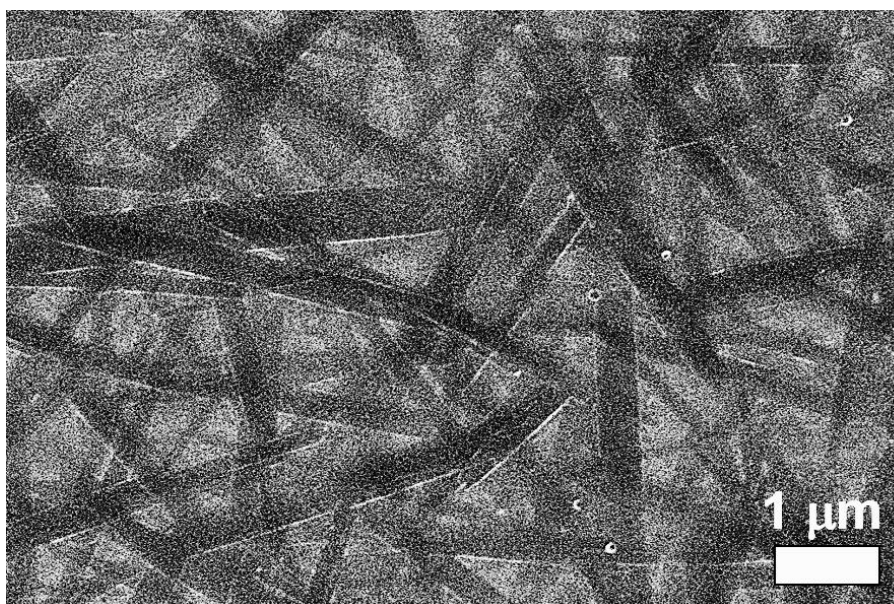

**Fig. S15** SEM image of the aggregates prepared from a MeCN solution of **1** after UV irradiation ( $[1] = ca. 1 \times 10^{-3} M$ ).

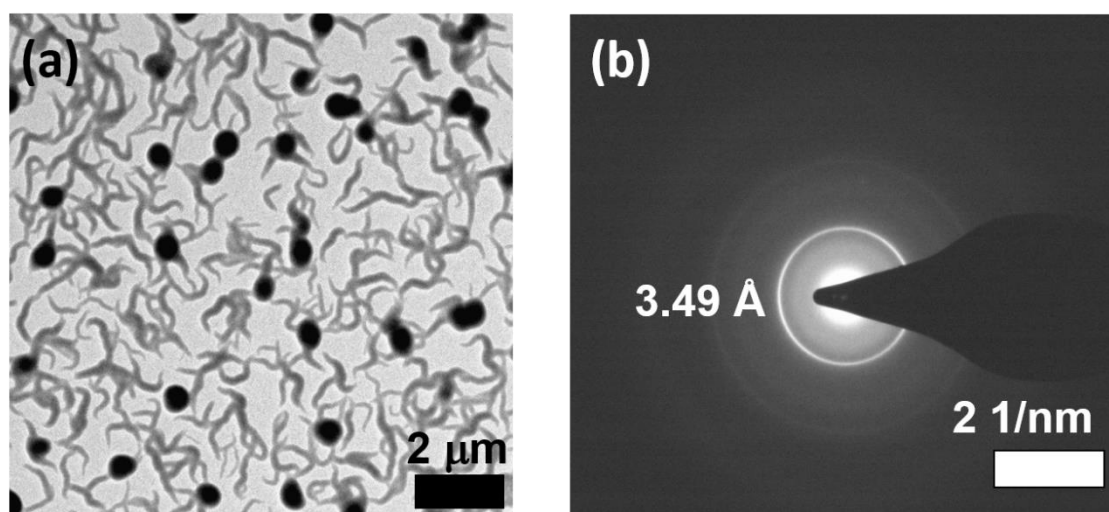

**Fig. S16** Electron micrographs of the aggregates prepared from a MeCN solution of **2** after UV irradiation. (a) TEM image and (b) the corresponding SAED experiment of the worm-like aggregates ( $[2] = ca. 1 \times 10^{-3} M$ ).

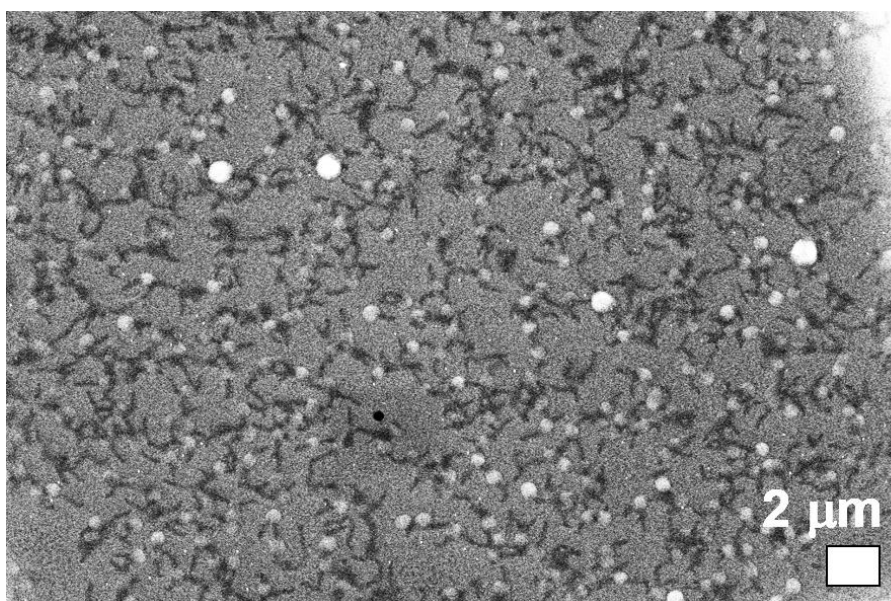

**Fig. S17** SEM image of the aggregates prepared from a MeCN solution of **2** after UV irradiation ( $[2] = ca. 1 \times 10^{-3} M$ ).

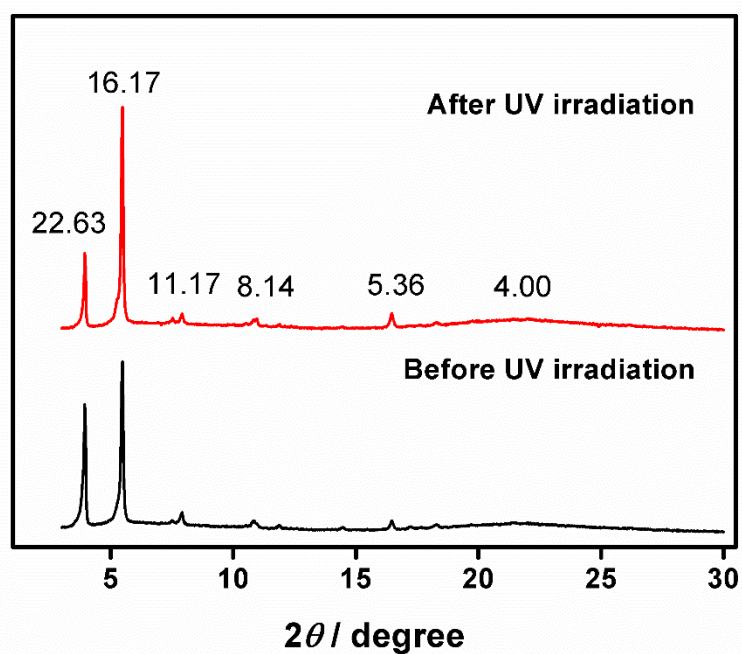

**Fig. S18** XRD patterns of **1** in cast film prepared from MeCN solution before and after UV irradiation ( $[1] = ca. 1 \times 10^{-3} M$ ) with the  $d$  spacings (in Å).

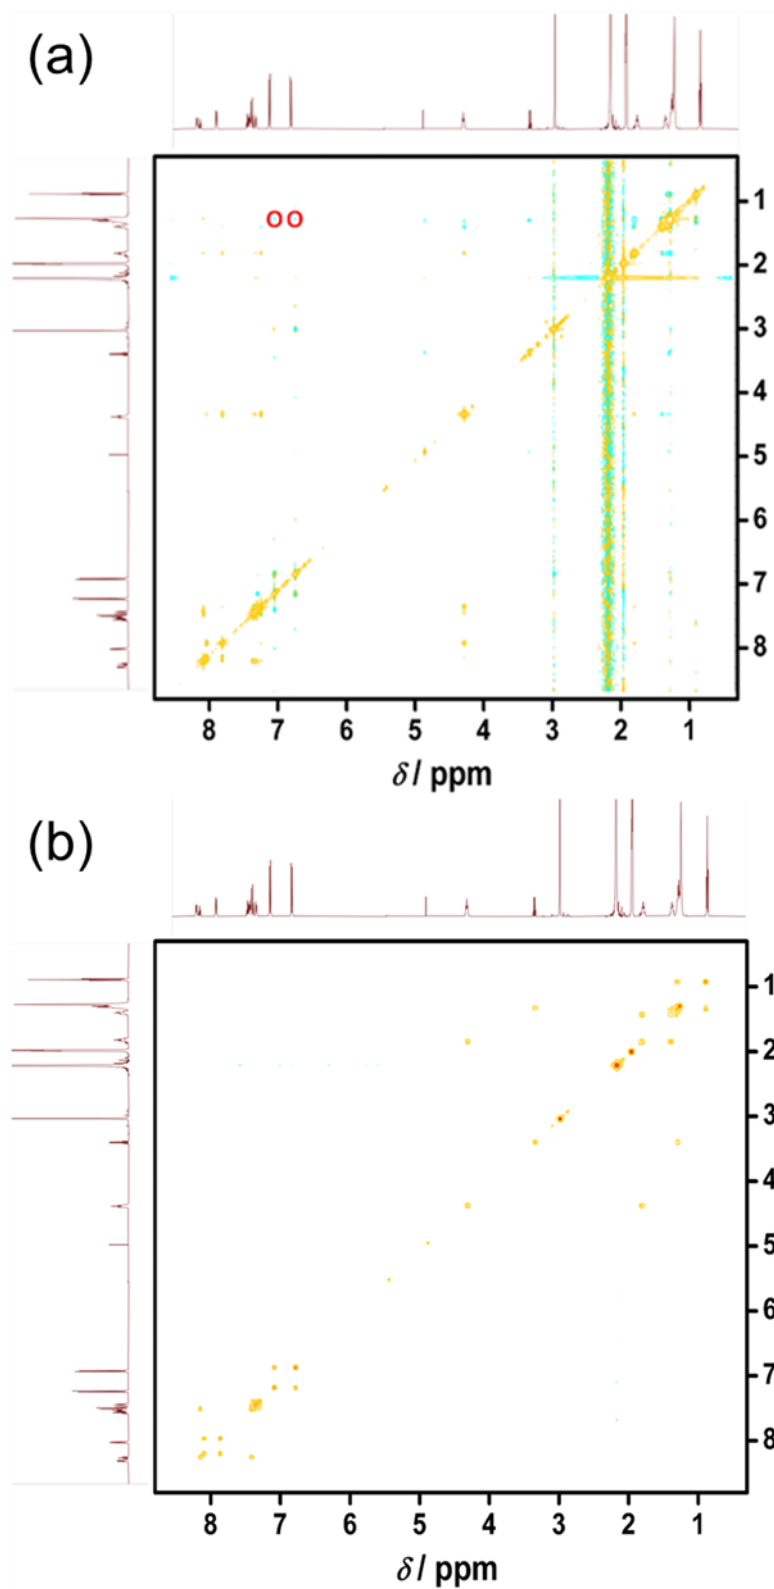

**Fig. S19** (a) 2D NOESY and (b) 2D COSY NMR spectra of **1** in  $[D_3]$ -MeCN solution before UV irradiation at 298 K ( $[1] = ca. 1 \times 10^{-3}$  M).

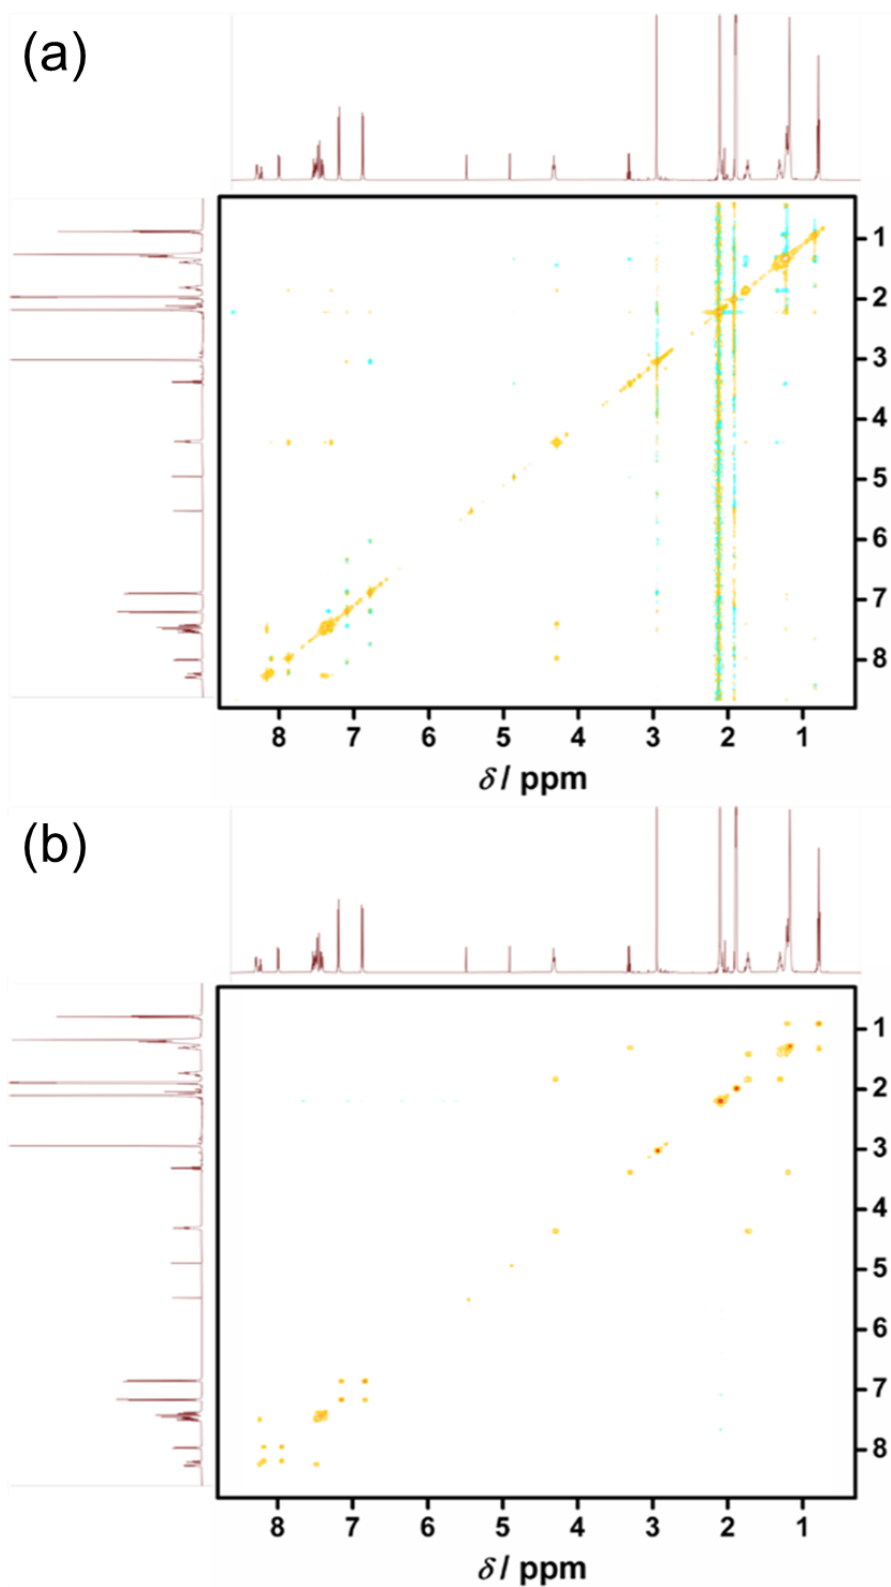

**Fig. S20** (a) 2D NOESY and (b) 2D COSY NMR spectra of **1** in  $[D_3]$ -MeCN solution after UV irradiation at 298 K ( $[1] = ca. 1 \times 10^{-3} \text{ M}$ ).

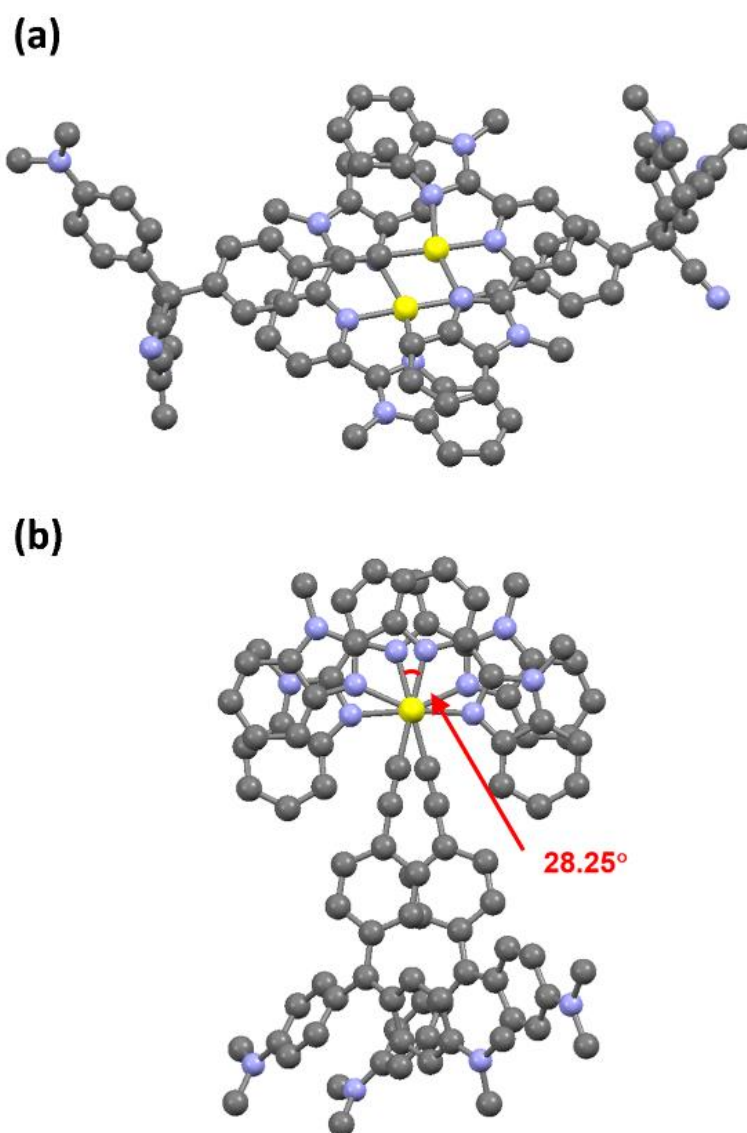

**Fig. S21** Ground-state geometry of the dimer of (a) 1' and (b) 1'' optimized at the M06 level. All hydrogen atoms were omitted for clarity.

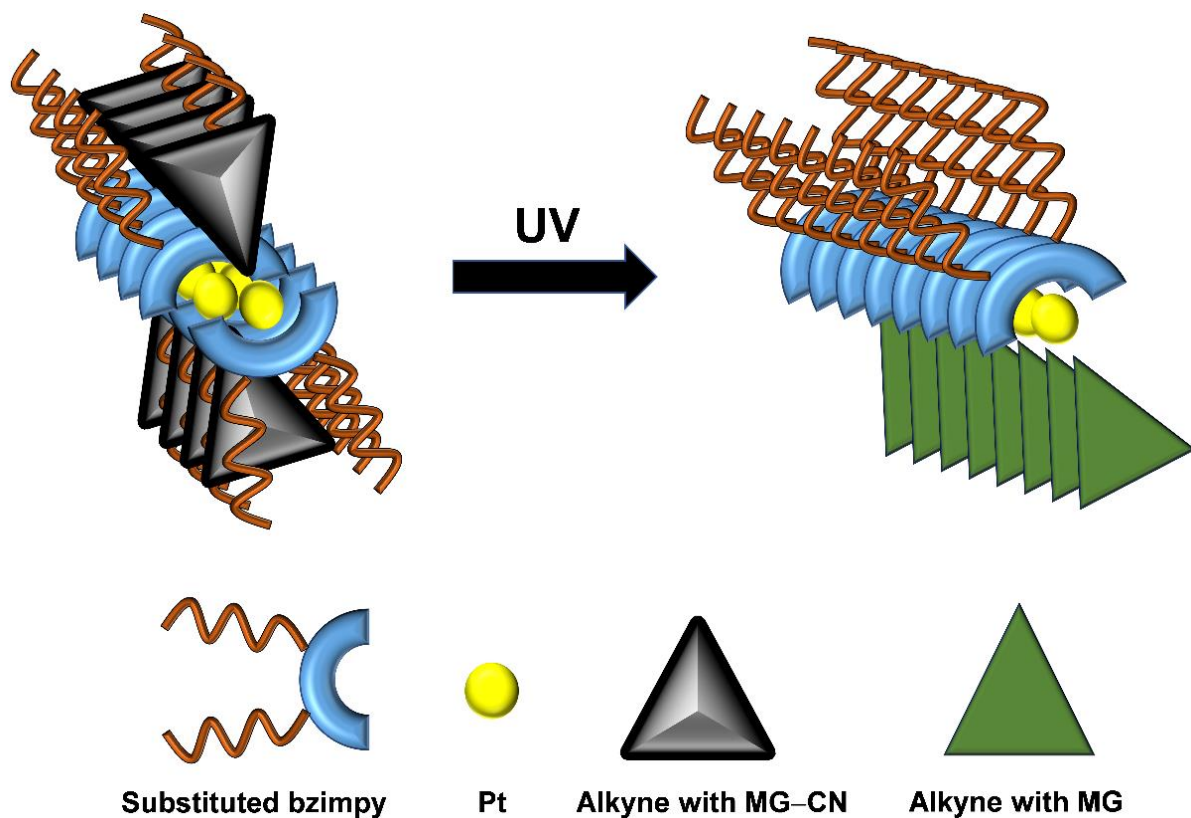

**Fig. S22** A cartoon representation showing the proposed conformational changes of the malachite green-based alkynylplatinum(II) bzimpy complexes upon UV irradiation.



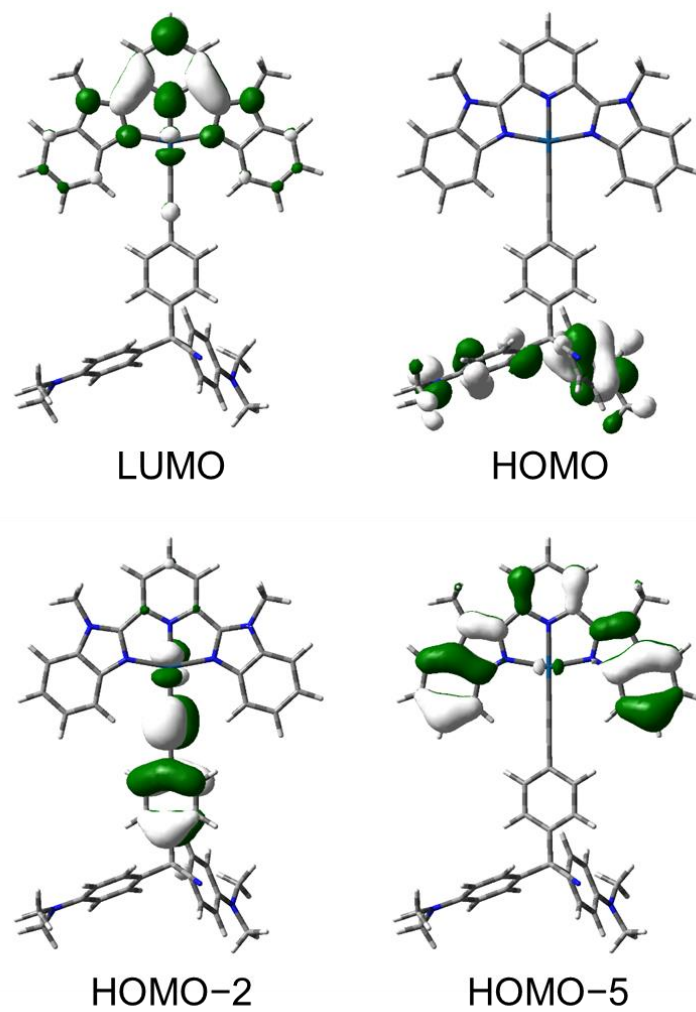

**Fig. S23** Spatial plots (isovalue = 0.03) of selected frontier molecular orbitals of **1'** obtained from the PBE0/CPCM (toluene) calculation.

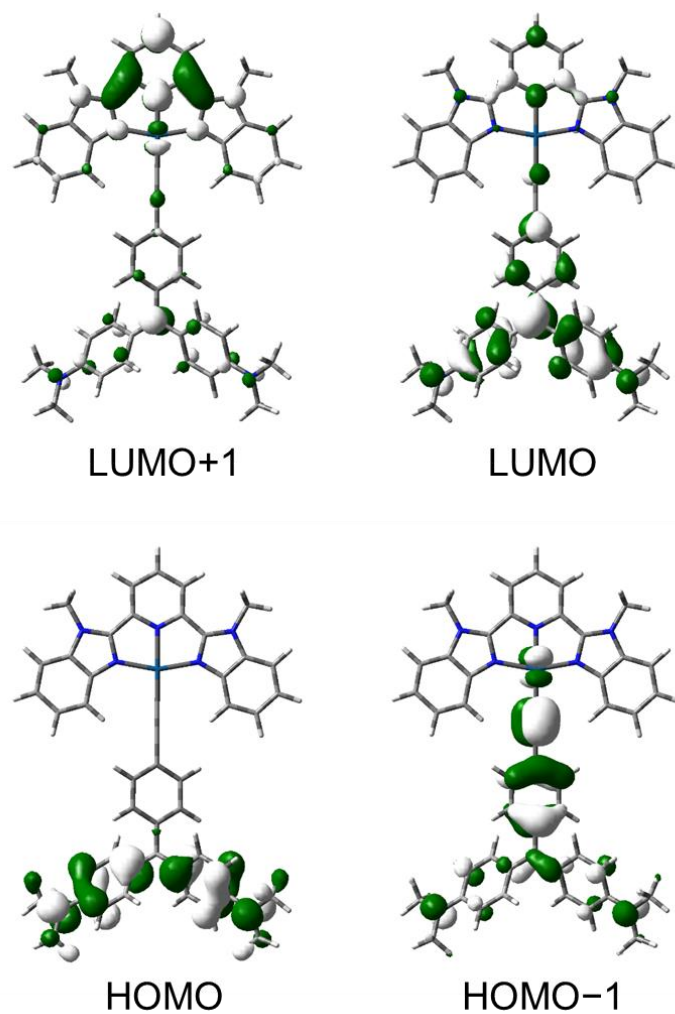

**Fig. S24** Spatial plots (isovalue = 0.03) of selected frontier molecular orbitals of **1''** obtained from the PBE0/CPCM (toluene) calculation.

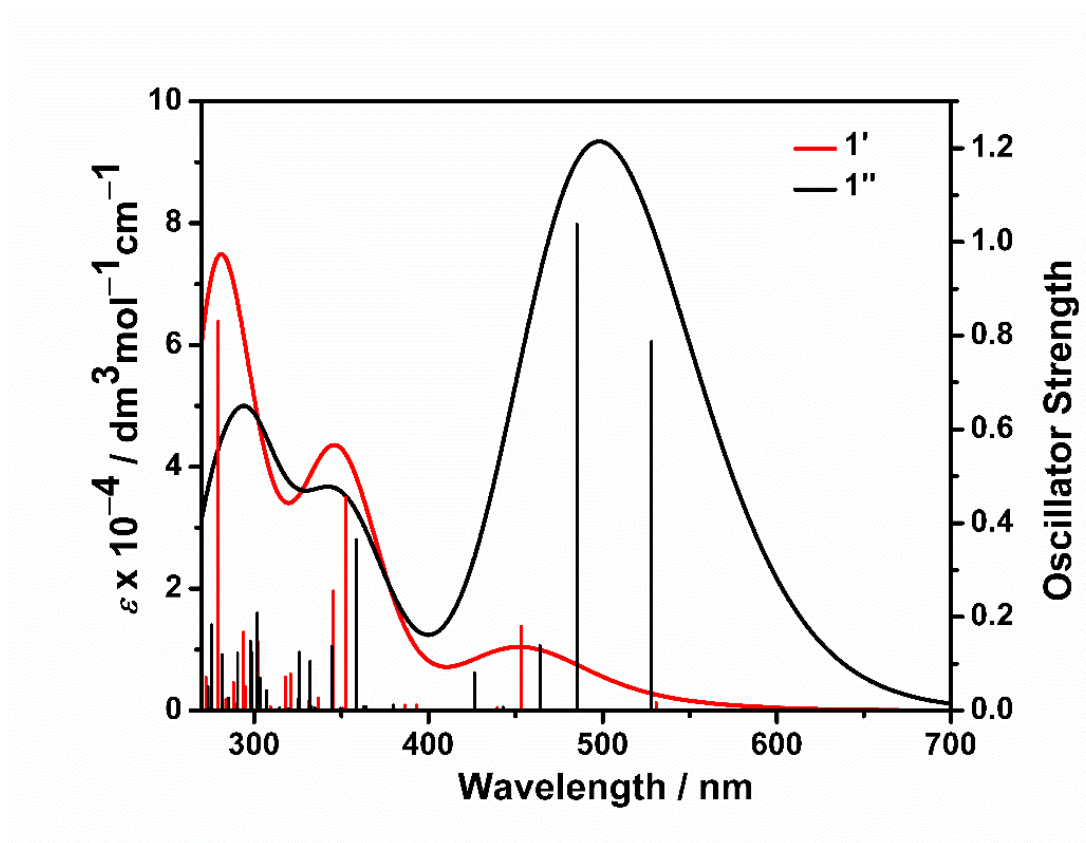

**Fig. S25** Simulated electronic absorption spectra of **1'** and **1''** in toluene. The height of the vertical straight lines are calculated oscillator strengths of the corresponding vertical transitions.

**Table S2** The first ten singlet ( $S_n$ ) excited states of  $\mathbf{1}'$  computed by TDDFT/CPCM (MeCN) at the optimized ground state geometries

| $S_n$    | Excitation <sup>a</sup><br>(Coefficient) <sup>b</sup> | Vertical excitation<br>wavelength / nm | $f^c$ | Character <sup>d</sup> |
|----------|-------------------------------------------------------|----------------------------------------|-------|------------------------|
| $S_1$    | H→L (0.70)                                            | 530                                    | 0.017 | LLCT                   |
| $S_2$    | H-1→L (0.71)                                          | 505                                    | 0.001 | LLCT                   |
| $S_3$    | H-2→L (0.69)                                          | 453                                    | 0.180 | LLCT/MLCT              |
| $S_4$    | H→L+1 (0.70)                                          | 441                                    | 0.000 | LLCT                   |
| $S_5$    | H-3→L (0.69)                                          | 439                                    | 0.007 | LLCT/MLCT              |
| $S_6$    | H-1→L+1 (0.71)                                        | 424                                    | 0.000 | LLCT                   |
| $S_7$    | H-4→L (0.70)                                          | 393                                    | 0.012 | LLCT/MLCT              |
| $S_8$    | H-2→L+1 (0.70)                                        | 386                                    | 0.012 | LLCT/MLCT              |
| $S_9$    | H-5→L (0.70)                                          | 352                                    | 0.455 | ILCT/IL                |
| $S_{10}$ | H-11→L (0.70)                                         | 350                                    | 0.005 | MLCT                   |

<sup>a</sup> The orbitals involved in the excitation (H = HOMO and L = LUMO).

<sup>b</sup> The coefficients in the configuration interaction (CI) expansion that are less than 0.3 are not listed.

<sup>c</sup> Oscillator strengths.

<sup>d</sup> Character of the transition.

**Table S3** The first ten singlet ( $S_n$ ) excited states of **1''** computed by TDDFT/CPCM (MeCN) at the optimized ground state geometries

| $S_n$    | Excitation <sup>a</sup><br>(Coefficient) <sup>b</sup> | Vertical excitation<br>wavelength / nm | $f^c$ | Character <sup>d</sup> |
|----------|-------------------------------------------------------|----------------------------------------|-------|------------------------|
| $S_1$    | H→L (0.70)                                            | 528                                    | 0.788 | IL/LLCT                |
| $S_2$    | H-1→L (0.69)                                          | 485                                    | 1.039 | MLCT/LLCT              |
| $S_3$    | H→L+1 (0.70)                                          | 464                                    | 0.139 | LLCT                   |
| $S_4$    | H-2→L+1 (0.52)                                        | 443                                    | 0.008 | IL/MLCT                |
|          | H-2→L (-0.47)                                         |                                        |       | LLCT/MLCT              |
| $S_5$    | H-1→L+1 (0.67)                                        | 426                                    | 0.081 | LLCT/MLCT              |
| $S_6$    | H→L+2 (0.71)                                          | 399                                    | 0.000 | LLCT                   |
| $S_7$    | H-4→L (0.58)                                          | 397                                    | 0.001 | MLCT                   |
| $S_8$    | H-2→L (0.48)                                          | 380                                    | 0.001 | MLCT/LLCT              |
|          | H-2→L+1 (0.42)                                        |                                        |       | IL/ILCT                |
| $S_9$    | H-1→L+2 (0.62)                                        | 380                                    | 0.012 | LLCT/MLCT              |
| $S_{10}$ | H-3→L (0.52)                                          | 364                                    | 0.009 | IL/MLCT                |
|          | H-4→L (0.43)                                          |                                        |       | MLCT                   |

<sup>a</sup> The orbitals involved in the excitation (H = HOMO and L = LUMO).

<sup>b</sup> The coefficients in the configuration interaction (CI) expansion that are less than 0.3 are not listed.

<sup>c</sup> Oscillator strengths.

<sup>d</sup> Character of the transition.

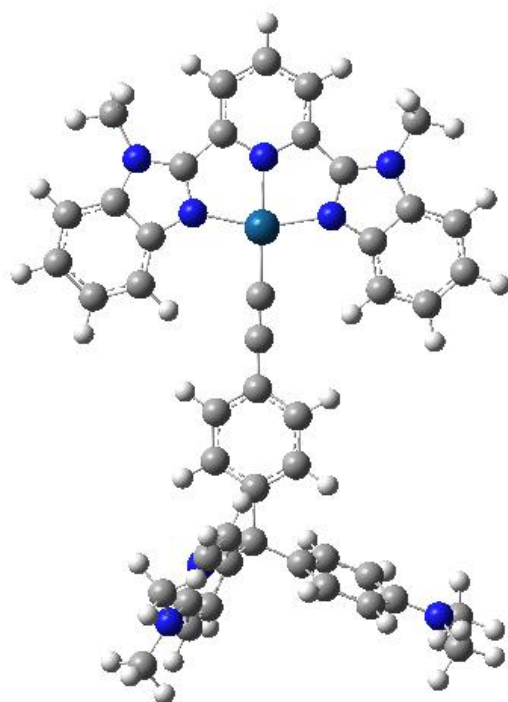

**Table S4** Cartesian coordinates of the ground-state geometry of **1'** optimized at the PBE0 level.

|    |   |          |          |          |    |   |          |          |          |
|----|---|----------|----------|----------|----|---|----------|----------|----------|
| 1  | C | -7.49985 | 1.478605 | 0.681355 | 50 | C | 2.909542 | -1.31356 | -1.47576 |
| 2  | C | -8.2735  | 0.335554 | 0.494847 | 51 | H | 0.893003 | -2.00787 | -1.7228  |
| 3  | C | -7.69459 | -0.88799 | 0.167696 | 52 | C | 3.192355 | 0.702006 | -0.19313 |
| 4  | C | -6.31051 | -0.94144 | 0.028874 | 53 | H | 1.396192 | 1.58184  | 0.589825 |
| 5  | C | -6.12036 | 1.367178 | 0.531143 | 54 | C | 3.752584 | -0.33646 | -0.93771 |
| 6  | H | -7.96808 | 2.419823 | 0.934842 | 55 | H | 3.329011 | -2.13609 | -2.0491  |
| 7  | H | -9.35041 | 0.399894 | 0.607864 | 56 | H | 3.833195 | 1.464838 | 0.23689  |
| 8  | H | -8.31057 | -1.7656  | 0.027522 | 57 | C | 5.276505 | -0.4551  | -1.09911 |
| 9  | C | -5.07187 | 2.377219 | 0.661055 | 58 | C | 5.84827  | -1.50251 | -0.13443 |
| 10 | C | -3.01592 | 3.126592 | 0.61023  | 59 | C | 7.089441 | -2.09535 | -0.38352 |
| 11 | C | -3.87048 | 4.199175 | 0.939778 | 60 | C | 5.196662 | -1.83887 | 1.051857 |
| 12 | C | -1.63407 | 3.308895 | 0.497773 | 61 | C | 7.659382 | -2.99185 | 0.506439 |
| 13 | C | -3.37751 | 5.484647 | 1.17323  | 62 | H | 7.629119 | -1.85815 | -1.29746 |
| 14 | C | -1.14929 | 4.583777 | 0.729099 | 63 | C | 5.754884 | -2.73013 | 1.958947 |
| 15 | H | -0.98851 | 2.477569 | 0.237885 | 64 | H | 4.229463 | -1.40305 | 1.28272  |
| 16 | C | -2.00704 | 5.652777 | 1.062567 | 65 | C | 7.011314 | -3.32662 | 1.717528 |
| 17 | H | -4.02941 | 6.313471 | 1.426698 | 66 | H | 8.615949 | -3.43537 | 0.255853 |
| 18 | H | -0.08226 | 4.769038 | 0.651815 | 67 | C | 5.968235 | 0.906486 | -0.94341 |

|    |    |          |          |          |    |   |          |          |          |
|----|----|----------|----------|----------|----|---|----------|----------|----------|
| 19 | H  | -1.58136 | 6.636404 | 1.235227 | 68 | C | 5.811216 | 1.892046 | -1.92271 |
| 20 | C  | -5.43844 | -2.06753 | -0.30074 | 69 | C | 6.717974 | 1.228931 | 0.186223 |
| 21 | C  | -3.51915 | -3.05194 | -0.67416 | 70 | C | 6.379895 | 3.148201 | -1.78826 |
| 22 | C  | -4.54348 | -4.01193 | -0.80879 | 71 | H | 5.234264 | 1.676158 | -2.81931 |
| 23 | C  | -2.17538 | -3.39673 | -0.84951 | 72 | C | 7.29184  | 2.484847 | 0.340866 |
| 24 | C  | -4.26505 | -5.3426  | -1.12712 | 73 | H | 6.86567  | 0.488541 | 0.966215 |
| 25 | C  | -1.90294 | -4.71602 | -1.16465 | 74 | C | 7.12983  | 3.488073 | -0.63847 |
| 26 | H  | -1.39621 | -2.65106 | -0.73777 | 75 | H | 6.240749 | 3.868415 | -2.58588 |
| 27 | C  | -2.93102 | -5.67204 | -1.30205 | 76 | H | 7.873082 | 2.680111 | 1.234419 |
| 28 | H  | -5.04861 | -6.08526 | -1.2307  | 77 | C | 5.54268  | -0.92206 | -2.4731  |
| 29 | H  | -0.87239 | -5.02581 | -1.30931 | 78 | N | 5.760812 | -1.2846  | -3.55362 |
| 30 | H  | -2.66943 | -6.69608 | -1.55015 | 79 | N | 7.671983 | 4.741228 | -0.48051 |
| 31 | N  | -5.73568 | -3.35609 | -0.56813 | 80 | C | 7.684115 | 5.652162 | -1.60437 |
| 32 | N  | -4.11066 | -1.85353 | -0.36025 | 81 | H | 8.111702 | 6.603321 | -1.28489 |
| 33 | N  | -3.79512 | 2.008352 | 0.446147 | 82 | H | 8.274841 | 5.274816 | -2.45276 |
| 34 | N  | -5.15509 | 3.689829 | 0.960252 | 83 | H | 6.667672 | 5.851755 | -1.95961 |
| 35 | C  | -7.05522 | -3.96148 | -0.61498 | 84 | C | 8.632346 | 4.962133 | 0.578608 |
| 36 | H  | -7.53622 | -3.8954  | 0.362816 | 85 | H | 8.947591 | 6.006263 | 0.56044  |
| 37 | H  | -7.66605 | -3.46844 | -1.37358 | 86 | H | 8.188338 | 4.769254 | 1.561224 |
| 38 | H  | -6.94203 | -5.0103  | -0.88186 | 87 | H | 9.527196 | 4.329602 | 0.478099 |
| 39 | C  | -6.36051 | 4.443521 | 1.257756 | 88 | H | 5.201692 | -2.96367 | 2.861057 |
| 40 | H  | -7.02985 | 4.437782 | 0.39494  | 89 | N | 7.581289 | -4.19083 | 2.618732 |
| 41 | H  | -6.86121 | 4.02001  | 2.130512 | 90 | C | 6.798974 | -4.66344 | 3.739162 |
| 42 | H  | -6.07933 | 5.471309 | 1.478357 | 91 | H | 7.419957 | -5.31283 | 4.357602 |
| 43 | N  | -5.58147 | 0.174948 | 0.213698 | 92 | H | 6.464774 | -3.83027 | 4.367351 |
| 44 | Pt | -3.59711 | 0.056122 | 0.003892 | 93 | H | 5.910295 | -5.23191 | 3.426178 |
| 45 | C  | -1.66159 | -0.05743 | -0.21063 | 94 | C | 8.758823 | -4.9386  | 2.237355 |
| 46 | C  | -0.44515 | -0.12488 | -0.35973 | 95 | H | 8.580779 | -5.59697 | 1.374018 |
| 47 | C  | 0.965745 | -0.2013  | -0.54397 | 96 | H | 9.590393 | -4.26969 | 1.988485 |
| 48 | C  | 1.5371   | -1.24835 | -1.28943 | 97 | H | 9.074944 | -5.55638 | 3.078694 |
| 49 | C  | 1.818842 | 0.769621 | 0.005676 |    |   |          |          |          |

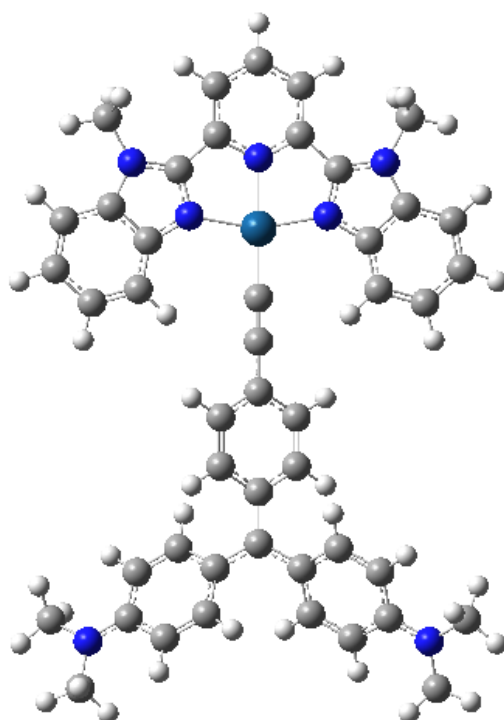

**Table S5** Cartesian coordinates of the ground-state geometry of **1''** optimized at the PBE0 level.

|    |   |          |          |          |    |   |          |          |          |
|----|---|----------|----------|----------|----|---|----------|----------|----------|
| 1  | C | 7.543881 | 1.196489 | 0.209122 | 49 | C | -1.79901 | 1.065015 | 0.578736 |
| 2  | C | 8.224492 | -6.3E-05 | -0.00044 | 50 | C | -3.18211 | -1.06774 | -0.56818 |
| 3  | C | 7.543803 | -1.19661 | -0.20982 | 51 | H | -1.25549 | -1.88319 | -1.04061 |
| 4  | C | 6.15213  | -1.16883 | -0.19879 | 52 | C | -3.1821  | 1.067894 | 0.568763 |
| 5  | C | 6.152201 | 1.168733 | 0.1985   | 53 | H | -1.25546 | 1.88326  | 1.04126  |
| 6  | H | 8.092033 | 2.113655 | 0.374221 | 54 | C | -3.90254 | 0.000094 | 0.000277 |
| 7  | H | 9.309312 | -7.2E-05 | -0.0006  | 55 | H | -3.72123 | -1.88585 | -1.03554 |
| 8  | H | 8.091886 | -2.11378 | -0.37511 | 56 | H | -3.72117 | 1.886061 | 1.03607  |
| 9  | C | 5.184296 | 2.249866 | 0.379088 | 57 | C | -5.36456 | 0.00008  | 0.000128 |
| 10 | C | 3.181053 | 3.120875 | 0.527907 | 58 | C | -6.06146 | -1.22186 | 0.240832 |
| 11 | C | 4.127199 | 4.151881 | 0.703739 | 59 | C | -7.34917 | -1.4693  | -0.30747 |
| 12 | C | 1.808124 | 3.38312  | 0.569835 | 60 | C | -5.49376 | -2.25691 | 1.032206 |
| 13 | C | 3.738359 | 5.474047 | 0.928896 | 61 | C | -8.02021 | -2.64376 | -0.08481 |
| 14 | C | 1.42649  | 4.694079 | 0.792707 | 62 | H | -7.78861 | -0.73424 | -0.97428 |
| 15 | H | 1.089042 | 2.583802 | 0.43123  | 63 | C | -6.16451 | -3.42412 | 1.289845 |
| 16 | C | 2.376244 | 5.721671 | 0.969813 | 64 | H | -4.52401 | -2.09881 | 1.493373 |
| 17 | H | 4.460767 | 6.271449 | 1.064597 | 65 | C | -7.45702 | -3.66145 | 0.738202 |
| 18 | H | 0.369742 | 4.940425 | 0.832265 | 66 | H | -8.97852 | -2.80143 | -0.56468 |



|    |    |          |          |          |    |   |          |          |          |
|----|----|----------|----------|----------|----|---|----------|----------|----------|
| 19 | H  | 2.030618 | 6.73627  | 1.142292 | 67 | H | -5.70556 | -4.16387 | 1.934326 |
| 20 | C  | 5.184165 | -2.24994 | -0.3792  | 68 | C | -6.06153 | 1.221969 | -0.24071 |
| 21 | C  | 3.180874 | -3.12087 | -0.5278  | 69 | C | -5.4938  | 2.257036 | -1.03203 |
| 22 | C  | 4.126959 | -4.15188 | -0.70391 | 70 | C | -7.34934 | 1.469334 | 0.3074   |
| 23 | C  | 1.807929 | -3.38306 | -0.56959 | 71 | C | -6.16461 | 3.424187 | -1.28981 |
| 24 | C  | 3.738044 | -5.474   | -0.92923 | 72 | H | -4.52395 | 2.099026 | -1.493   |
| 25 | C  | 1.426222 | -4.69397 | -0.7926  | 73 | C | -8.02046 | 2.643712 | 0.08455  |
| 26 | H  | 1.088892 | -2.58374 | -0.43078 | 74 | H | -7.7888  | 0.734286 | 0.974212 |
| 27 | C  | 2.375916 | -5.72157 | -0.97    | 75 | C | -7.45727 | 3.661373 | -0.73849 |
| 28 | H  | 4.460412 | -6.2714  | -1.06516 | 76 | H | -5.70558 | 4.164005 | -1.93416 |
| 29 | H  | 0.36946  | -4.94028 | -0.83204 | 77 | H | -8.97882 | 2.801355 | 0.564333 |
| 30 | H  | 2.03023  | -6.73613 | -1.14258 | 78 | N | -8.11677 | -4.80978 | 0.978356 |
| 31 | N  | 5.37486  | -3.56671 | -0.60325 | 79 | N | -8.1171  | 4.809612 | -0.97895 |
| 32 | N  | 3.872412 | -1.95143 | -0.32928 | 80 | C | -7.50738 | -5.85309 | 1.783226 |
| 33 | N  | 3.872524 | 1.951389 | 0.329468 | 81 | H | -7.3201  | -5.50839 | 2.806611 |
| 34 | N  | 5.375068 | 3.566644 | 0.603033 | 82 | H | -8.18254 | -6.70618 | 1.827106 |
| 35 | C  | 6.645473 | -4.26328 | -0.71407 | 83 | H | -6.55876 | -6.18609 | 1.347981 |
| 36 | H  | 7.207856 | -3.88222 | -1.56865 | 84 | C | -9.4439  | -5.02427 | 0.430427 |
| 37 | H  | 7.220845 | -4.14107 | 0.205731 | 85 | H | -9.42505 | -5.0411  | -0.6656  |
| 38 | H  | 6.446274 | -5.32192 | -0.86638 | 86 | H | -9.82158 | -5.98326 | 0.78182  |
| 39 | C  | 6.645723 | 4.26316  | 0.713666 | 87 | H | -10.1372 | -4.24087 | 0.755173 |
| 40 | H  | 7.208319 | 3.881898 | 1.568024 | 88 | C | -9.44419 | 5.024252 | -0.43098 |
| 41 | H  | 7.220848 | 4.141166 | -0.20631 | 89 | H | -9.82217 | 5.982865 | -0.78308 |
| 42 | H  | 6.44659  | 5.321761 | 0.866334 | 90 | H | -10.1373 | 4.240438 | -0.75506 |
| 43 | N  | 5.514092 | -4.7E-05 | -4.8E-05 | 91 | H | -9.42524 | 5.041887 | 0.665038 |
| 44 | Pt | 3.514603 | -1.9E-05 | 0.000134 | 92 | C | -7.50728 | 5.853099 | -1.78327 |
| 45 | C  | 1.566659 | 0.000004 | 0.000294 | 93 | H | -8.1829  | 6.705763 | -1.82829 |
| 46 | C  | 0.338763 | 0.000003 | 0.000352 | 94 | H | -6.55939 | 6.186762 | -1.34689 |
| 47 | C  | -1.08142 | 0.000031 | 0.000332 | 95 | H | -7.31847 | 5.508245 | -2.80632 |
| 48 | C  | -1.79903 | -1.06493 | -0.57809 |    |   |          |          |          |

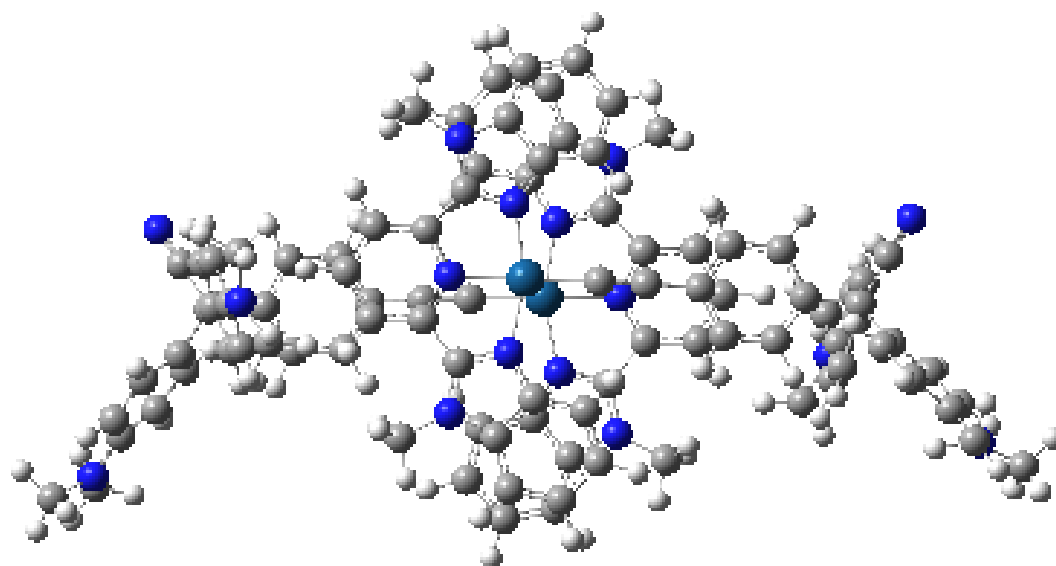

**Table S6** Cartesian coordinates of the ground-state geometry of dimer of **1'** optimized at the PBE0 level.

|    |   |          |          |          |     |   |          |          |          |
|----|---|----------|----------|----------|-----|---|----------|----------|----------|
| 1  | C | 4.241716 | 1.612316 | -2.02352 | 98  | C | 7.10069  | 0.353357 | 1.015293 |
| 2  | C | 4.944502 | 0.412272 | -1.95403 | 99  | H | 7.061847 | 2.491496 | 0.736087 |
| 3  | C | 4.286218 | -0.80329 | -1.79203 | 100 | H | 6.795456 | -1.74746 | 1.398579 |
| 4  | C | 2.895766 | -0.79201 | -1.70888 | 101 | C | 8.55088  | 0.165354 | 0.539866 |
| 5  | C | 2.853792 | 1.566989 | -1.93303 | 102 | C | 8.464311 | -0.19578 | -0.9505  |
| 6  | H | 4.768621 | 2.548021 | -2.15218 | 103 | C | 8.62611  | 0.754268 | -1.95797 |
| 7  | H | 6.02603  | 0.425868 | -2.02595 | 104 | C | 8.06121  | -1.47978 | -1.33085 |
| 8  | H | 4.851972 | -1.72342 | -1.744   | 105 | C | 8.390173 | 0.447883 | -3.29348 |
| 9  | C | 1.868278 | 2.643247 | -2.01824 | 106 | H | 8.925464 | 1.768794 | -1.70815 |
| 10 | C | -0.1505  | 3.487522 | -2.1013  | 107 | C | 7.820595 | -1.80298 | -2.65657 |
| 11 | C | 0.776521 | 4.543146 | -2.22774 | 108 | H | 7.923477 | -2.25001 | -0.57793 |
| 12 | C | -1.52797 | 3.725511 | -2.12638 | 109 | C | 7.978145 | -0.8439  | -3.6838  |
| 13 | C | 0.363015 | 5.866198 | -2.39006 | 110 | H | 8.518934 | 1.229977 | -4.03219 |
| 14 | C | -1.93459 | 5.039425 | -2.28551 | 111 | C | 9.34305  | -0.84704 | 1.37727  |
| 15 | H | -2.22976 | 2.904612 | -2.03235 | 112 | C | 9.142407 | -0.94448 | 2.757075 |
| 16 | C | -1.00401 | 6.091003 | -2.41605 | 113 | C | 10.37626 | -1.60177 | 0.818313 |
| 17 | H | 1.071155 | 6.681816 | -2.48603 | 114 | C | 9.908076 | -1.78969 | 3.544984 |
| 18 | H | -2.99569 | 5.268017 | -2.3141  | 115 | H | 8.371962 | -0.34524 | 3.23456  |
| 19 | H | -1.36851 | 7.106177 | -2.53875 | 116 | C | 11.15337 | -2.45278 | 1.590317 |
| 20 | C | 1.946451 | -1.89856 | -1.59115 | 117 | H | 10.58636 | -1.52594 | -0.24451 |
| 21 | C | -0.04404 | -2.81056 | -1.5522  | 118 | C | 10.9298  | -2.58619 | 2.979169 |
| 22 | C | 0.915794 | -3.84324 | -1.51853 | 119 | H | 9.710441 | -1.8251  | 4.609866 |

|    |    |          |          |          |     |   |          |          |          |
|----|----|----------|----------|----------|-----|---|----------|----------|----------|
| 23 | C  | -1.41348 | -3.09234 | -1.54455 | 120 | H | 11.94239 | -3.01545 | 1.105313 |
| 24 | C  | 0.542203 | -5.18819 | -1.48821 | 121 | C | 9.284531 | 1.43189  | 0.695148 |
| 25 | C  | -1.78012 | -4.42642 | -1.51207 | 122 | N | 9.887276 | 2.41357  | 0.835758 |
| 26 | H  | -2.13774 | -2.2867  | -1.5696  | 123 | N | 11.66989 | -3.4512  | 3.743954 |
| 27 | C  | -0.81701 | -5.45656 | -1.48755 | 124 | C | 11.54902 | -3.40897 | 5.184725 |
| 28 | H  | 1.274172 | -5.98812 | -1.46571 | 125 | H | 12.18958 | -4.17886 | 5.616589 |
| 29 | H  | -2.83377 | -4.6891  | -1.50695 | 126 | H | 11.84652 | -2.43731 | 5.606017 |
| 30 | H  | -1.1494  | -6.48975 | -1.46452 | 127 | H | 10.52111 | -3.61729 | 5.502014 |
| 31 | N  | 2.155389 | -3.23198 | -1.53453 | 128 | C | 12.83719 | -4.08424 | 3.170718 |
| 32 | N  | 0.630108 | -1.6161  | -1.59418 | 129 | H | 13.2787  | -4.75146 | 3.911869 |
| 33 | N  | 0.561951 | 2.321794 | -1.97071 | 130 | H | 12.56979 | -4.68987 | 2.297661 |
| 34 | N  | 2.035018 | 3.97485  | -2.16291 | 131 | H | 13.60278 | -3.35805 | 2.859871 |
| 35 | C  | 3.435755 | -3.91699 | -1.48752 | 132 | H | 7.504091 | -2.81224 | -2.89187 |
| 36 | H  | 3.976441 | -3.77443 | -2.42612 | 133 | N | 7.738279 | -1.15973 | -5.00054 |
| 37 | H  | 4.028646 | -3.54248 | -0.65132 | 134 | C | 7.034061 | -2.38702 | -5.30571 |
| 38 | H  | 3.253835 | -4.9794  | -1.33783 | 135 | H | 6.9351   | -2.47853 | -6.38803 |
| 39 | C  | 3.291648 | 4.701319 | -2.20426 | 136 | H | 7.590296 | -3.26079 | -4.95157 |
| 40 | H  | 3.888651 | 4.461839 | -1.32288 | 137 | H | 6.026489 | -2.41916 | -4.8622  |
| 41 | H  | 3.842861 | 4.455152 | -3.11443 | 138 | C | 7.656651 | -0.08853 | -5.97023 |
| 42 | H  | 3.073042 | 5.767295 | -2.19807 | 139 | H | 6.835312 | 0.613577 | -5.75874 |
| 43 | N  | 2.237308 | 0.379851 | -1.77974 | 140 | H | 8.591354 | 0.480152 | -6.0069  |
| 44 | Pt | 0.239004 | 0.350303 | -1.7485  | 141 | H | 7.495998 | -0.51832 | -6.95989 |
| 45 | C  | -4.31082 | -0.19417 | 1.890482 | 142 | C | -1.70951 | 0.311333 | -1.77493 |
| 46 | C  | -4.94446 | 1.044838 | 1.853588 | 143 | C | -2.93595 | 0.278185 | -1.74586 |
| 47 | C  | -4.22159 | 2.223    | 1.679677 | 144 | C | -4.34895 | 0.222579 | -1.58488 |
| 48 | C  | -2.8378  | 2.133633 | 1.556071 | 145 | C | -5.12054 | 1.394336 | -1.54042 |
| 49 | C  | -2.92463 | -0.2252  | 1.762322 | 146 | C | -4.99598 | -1.00949 | -1.38229 |
| 50 | H  | -4.8897  | -1.09654 | 2.031949 | 147 | C | -6.47584 | 1.337478 | -1.24278 |
| 51 | H  | -6.02215 | 1.093653 | 1.962384 | 148 | H | -4.64217 | 2.354961 | -1.70781 |
| 52 | H  | -4.73331 | 3.175392 | 1.656361 | 149 | C | -6.35148 | -1.06014 | -1.09523 |
| 53 | C  | -2.00104 | -1.35714 | 1.802224 | 150 | H | -4.42178 | -1.92955 | -1.43718 |
| 54 | C  | -0.03266 | -2.31414 | 1.848793 | 151 | C | -7.10334 | 0.114491 | -0.99688 |
| 55 | C  | -1.01628 | -3.32268 | 1.915211 | 152 | H | -7.04227 | 2.262693 | -1.18061 |
| 56 | C  | 1.329899 | -2.6258  | 1.859729 | 153 | H | -6.8251  | -2.02316 | -0.93378 |
| 57 | C  | -0.67432 | -4.67309 | 2.003543 | 154 | C | -8.54767 | 0.054831 | -0.47147 |
| 58 | C  | 1.665422 | -3.9659  | 1.946902 | 155 | C | -8.44502 | 0.10348  | 1.059824 |
| 59 | H  | 2.071873 | -1.83774 | 1.804872 | 156 | C | -9.33604 | -1.15002 | -1.00222 |
| 60 | C  | 0.67892  | -4.97116 | 2.02026  | 157 | C | -9.28674 | 1.232519 | -0.95453 |

|    |    |          |          |          |     |   |          |          |          |
|----|----|----------|----------|----------|-----|---|----------|----------|----------|
| 61 | H  | -1.42483 | -5.45431 | 2.053044 | 158 | C | -8.69727 | 1.260877 | 1.79457  |
| 62 | H  | 2.712446 | -4.25351 | 1.960193 | 159 | C | -7.95154 | -1.00737 | 1.752304 |
| 63 | H  | 0.987843 | -6.00979 | 2.086098 | 160 | C | -9.20197 | -1.54794 | -2.33614 |
| 64 | C  | -1.82966 | 3.182272 | 1.403602 | 161 | C | -10.2882 | -1.80819 | -0.22277 |
| 65 | C  | 0.207347 | 3.979481 | 1.288497 | 162 | N | -9.88861 | 2.14071  | -1.35402 |
| 66 | C  | -0.69649 | 5.056618 | 1.179018 | 163 | C | -8.46582 | 1.319431 | 3.164536 |
| 67 | C  | 1.589807 | 4.186425 | 1.25348  | 164 | H | -9.07102 | 2.152492 | 1.297978 |
| 68 | C  | -0.2543  | 6.373289 | 1.041545 | 165 | C | -7.71741 | -0.96896 | 3.117013 |
| 69 | C  | 2.024608 | 5.493232 | 1.112705 | 166 | H | -7.73447 | -1.92695 | 1.21698  |
| 70 | H  | 2.274353 | 3.350293 | 1.341413 | 167 | C | -9.95108 | -2.58736 | -2.86319 |
| 71 | C  | 1.117101 | 6.567868 | 1.009846 | 168 | H | -8.49559 | -1.03498 | -2.98354 |
| 72 | H  | -0.94457 | 7.205629 | 0.959842 | 169 | C | -11.0474 | -2.85219 | -0.73244 |
| 73 | H  | 3.090334 | 5.699088 | 1.084644 | 170 | H | -10.4473 | -1.50358 | 0.807217 |
| 74 | H  | 1.503629 | 7.576692 | 0.903414 | 171 | C | -7.9701  | 0.202103 | 3.86912  |
| 75 | N  | -1.96692 | 4.515818 | 1.244064 | 172 | H | -8.67041 | 2.248541 | 3.683099 |
| 76 | N  | -0.53016 | 2.829895 | 1.422104 | 173 | H | -7.32861 | -1.85796 | 3.599539 |
| 77 | N  | -0.67925 | -1.10617 | 1.775708 | 174 | C | -10.8864 | -3.28774 | -2.06653 |
| 78 | N  | -2.24177 | -2.68366 | 1.870687 | 175 | H | -9.80681 | -2.85608 | -3.90302 |
| 79 | C  | -3.20636 | 5.259516 | 1.107821 | 176 | H | -11.7738 | -3.32841 | -0.08431 |
| 80 | H  | -3.82625 | 4.807218 | 0.332224 | 177 | N | -7.74142 | 0.245464 | 5.222735 |
| 81 | H  | -3.74404 | 5.283823 | 2.058127 | 178 | N | -11.6014 | -4.3447  | -2.56829 |
| 82 | H  | -2.96616 | 6.277849 | 0.808293 | 179 | C | -6.99613 | -0.82809 | 5.843359 |
| 83 | C  | -3.53833 | -3.33789 | 1.845123 | 180 | C | -7.77533 | 1.523531 | 5.89975  |
| 84 | H  | -4.08874 | -3.13206 | 2.765743 | 181 | C | -11.5626 | -4.61934 | -3.98786 |
| 85 | H  | -4.10826 | -2.9966  | 0.978756 | 182 | C | -12.6753 | -4.91442 | -1.78531 |
| 86 | H  | -3.37957 | -4.41118 | 1.759056 | 183 | H | -6.92529 | -0.63714 | 6.914834 |
| 87 | N  | -2.24505 | 0.92575  | 1.609405 | 184 | H | -7.50544 | -1.78874 | 5.713071 |
| 88 | Pt | -0.24724 | 0.847629 | 1.588261 | 185 | H | -5.97595 | -0.92369 | 5.440207 |
| 89 | C  | 1.699882 | 0.772742 | 1.652543 | 186 | H | -7.01834 | 2.225938 | 5.518473 |
| 90 | C  | 2.925727 | 0.711719 | 1.651865 | 187 | H | -8.75817 | 1.996193 | 5.799961 |
| 91 | C  | 4.339954 | 0.607624 | 1.526722 | 188 | H | -7.59264 | 1.366124 | 6.963481 |
| 92 | C  | 5.125497 | 1.735651 | 1.242708 | 189 | H | -12.1687 | -5.50181 | -4.19548 |
| 93 | C  | 4.974816 | -0.64531 | 1.599051 | 190 | H | -11.951  | -3.78523 | -4.5907  |
| 94 | C  | 6.484438 | 1.605457 | 0.985292 | 191 | H | -10.5412 | -4.83345 | -4.32167 |
| 95 | H  | 4.65648  | 2.714141 | 1.195626 | 192 | H | -13.0909 | -5.76857 | -2.32123 |
| 96 | C  | 6.332535 | -0.76728 | 1.348444 | 193 | H | -12.3088 | -5.2773  | -0.81866 |
| 97 | H  | 4.387938 | -1.52792 | 1.835597 | 194 | H | -13.4884 | -4.19831 | -1.59472 |

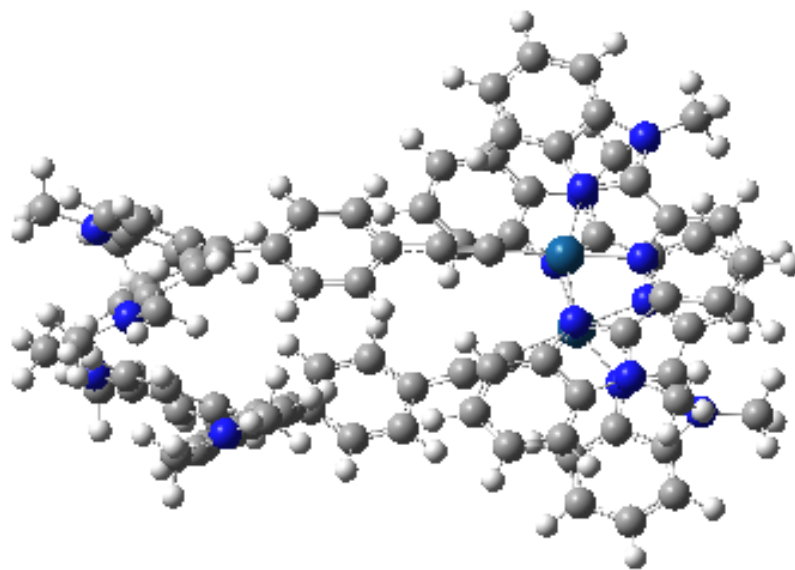

**Table S7** Cartesian coordinates of the ground-state geometry of dimer of **1''** optimized at the PBE0 level.

|    |   |          |          |          |     |   |          |          |          |
|----|---|----------|----------|----------|-----|---|----------|----------|----------|
| 1  | C | 7.25859  | 2.553333 | -0.72254 | 96  | C | 7.368099 | -0.18634 | 2.027896 |
| 2  | C | 8.236051 | 1.596853 | -0.98867 | 97  | C | 7.764842 | -1.46218 | 1.633517 |
| 3  | C | 7.900167 | 0.313586 | -1.41377 | 98  | C | 6.83629  | -2.42113 | 1.235821 |
| 4  | C | 6.550433 | 0.005184 | -1.56117 | 99  | C | 5.489311 | -2.06635 | 1.228917 |
| 5  | C | 5.923839 | 2.191274 | -0.88491 | 100 | C | 6.008965 | 0.114326 | 2.000056 |
| 6  | H | 7.539533 | 3.549407 | -0.40803 | 101 | H | 8.101802 | 0.539483 | 2.349842 |
| 7  | H | 9.281576 | 1.85971  | -0.86843 | 102 | H | 8.81918  | -1.717   | 1.643751 |
| 8  | H | 8.672472 | -0.41235 | -1.62855 | 103 | H | 7.163533 | -3.41024 | 0.947441 |
| 9  | C | 4.702667 | 2.970457 | -0.69152 | 104 | C | 5.306543 | 1.338917 | 2.373688 |
| 10 | C | 2.537414 | 3.283999 | -0.62457 | 105 | C | 3.545276 | 2.588641 | 2.734139 |
| 11 | C | 3.169598 | 4.480104 | -0.22562 | 106 | C | 4.69489  | 3.339308 | 3.058444 |
| 12 | C | 1.14419  | 3.170613 | -0.6445  | 107 | C | 2.262045 | 3.124389 | 2.880558 |
| 13 | C | 2.435205 | 5.611228 | 0.135282 | 108 | C | 4.604025 | 4.651564 | 3.528149 |
| 14 | C | 0.41918  | 4.291383 | -0.27896 | 109 | C | 2.175925 | 4.419951 | 3.356669 |
| 15 | H | 0.674795 | 2.236925 | -0.92937 | 110 | H | 1.38864  | 2.535635 | 2.62552  |
| 16 | C | 1.055399 | 5.493116 | 0.097489 | 111 | C | 3.328036 | 5.171583 | 3.670842 |
| 17 | H | 2.915012 | 6.533814 | 0.442042 | 112 | H | 5.483412 | 5.235338 | 3.777614 |
| 18 | H | -0.6658  | 4.246129 | -0.27814 | 113 | H | 1.199072 | 4.875889 | 3.483649 |
| 19 | H | 0.446355 | 6.348064 | 0.374453 | 114 | H | 3.211695 | 6.18724  | 4.036125 |
| 20 | C | 5.90896  | -1.22542 | -2.02088 | 115 | C | 4.310912 | -2.8473  | 0.862866 |
| 21 | C | 4.213895 | -2.47663 | -2.62288 | 116 | C | 2.181385 | -3.17112 | 0.481468 |

|    |    |          |          |          |     |    |          |          |          |
|----|----|----------|----------|----------|-----|----|----------|----------|----------|
| 22 | C  | 5.397149 | -3.22844 | -2.77732 | 117 | C  | 2.867317 | -4.37356 | 0.209375 |
| 23 | C  | 2.96401  | -3.01612 | -2.94261 | 118 | C  | 0.799776 | -3.06547 | 0.293153 |
| 24 | C  | 5.375427 | -4.54116 | -3.25251 | 119 | C  | 2.198012 | -5.51384 | -0.23908 |
| 25 | C  | 2.946477 | -4.31561 | -3.41711 | 120 | C  | 0.140093 | -4.19691 | -0.15358 |
| 26 | H  | 2.062353 | -2.42812 | -2.81695 | 121 | H  | 0.288367 | -2.12982 | 0.485533 |
| 27 | C  | 4.131956 | -5.0658  | -3.56611 | 122 | C  | 0.828166 | -5.40127 | -0.41188 |
| 28 | H  | 6.283014 | -5.12158 | -3.37715 | 123 | H  | 2.719133 | -6.43969 | -0.45604 |
| 29 | H  | 1.996998 | -4.77427 | -3.67477 | 124 | H  | -0.93269 | -4.15762 | -0.31729 |
| 30 | H  | 4.069042 | -6.08285 | -3.94041 | 125 | H  | 0.269184 | -6.26315 | -0.76299 |
| 31 | N  | 6.440566 | -2.41473 | -2.37801 | 126 | N  | 4.205299 | -4.13027 | 0.455255 |
| 32 | N  | 4.568222 | -1.24046 | -2.14316 | 127 | N  | 3.106911 | -2.24657 | 0.895151 |
| 33 | N  | 3.51855  | 2.371234 | -0.91747 | 128 | N  | 3.962382 | 1.355741 | 2.299353 |
| 34 | N  | 4.530514 | 4.242698 | -0.27075 | 129 | N  | 5.783969 | 2.523978 | 2.812119 |
| 35 | C  | 7.840568 | -2.79876 | -2.34394 | 130 | C  | 5.28213  | -5.09713 | 0.328989 |
| 36 | H  | 8.40732  | -2.2341  | -3.08727 | 131 | H  | 6.01076  | -4.75527 | -0.40723 |
| 37 | H  | 8.248933 | -2.62979 | -1.34587 | 132 | H  | 5.762177 | -5.24971 | 1.297653 |
| 38 | H  | 7.908448 | -3.86036 | -2.57508 | 133 | H  | 4.860855 | -6.04082 | -0.01102 |
| 39 | C  | 5.56728  | 5.201974 | 0.069484 | 134 | C  | 7.176121 | 2.88692  | 3.010963 |
| 40 | H  | 6.189979 | 4.811374 | 0.876104 | 135 | H  | 7.615302 | 2.277195 | 3.803283 |
| 41 | H  | 6.177508 | 5.422893 | -0.80867 | 136 | H  | 7.731495 | 2.75499  | 2.080763 |
| 42 | H  | 5.08983  | 6.118238 | 0.410386 | 137 | H  | 7.222007 | 3.934044 | 3.302965 |
| 43 | N  | 5.621814 | 0.940333 | -1.28265 | 138 | N  | 5.129536 | -0.82116 | 1.592188 |
| 44 | Pt | 3.699355 | 0.474591 | -1.5653  | 139 | Pt | 3.185872 | -0.34982 | 1.570486 |
| 45 | C  | 1.833645 | 0.046186 | -1.92093 | 140 | C  | 1.283946 | 0.075463 | 1.63005  |
| 46 | C  | 0.650948 | -0.22032 | -2.1137  | 141 | C  | 0.080269 | 0.317237 | 1.670391 |
| 47 | C  | -0.74042 | -0.48614 | -2.19716 | 142 | C  | -1.32303 | 0.534201 | 1.674793 |
| 48 | C  | -1.22572 | -1.78482 | -2.44866 | 143 | C  | -2.20354 | -0.55156 | 1.5033   |
| 49 | C  | -1.66697 | 0.546678 | -1.95915 | 144 | C  | -1.87074 | 1.823746 | 1.833636 |
| 50 | C  | -2.58277 | -2.05158 | -2.39624 | 145 | C  | -3.56986 | -0.35283 | 1.492507 |
| 51 | H  | -0.52256 | -2.58301 | -2.66268 | 146 | H  | -1.79909 | -1.54895 | 1.361114 |
| 52 | C  | -3.02061 | 0.27715  | -1.91841 | 147 | C  | -3.24142 | 2.016644 | 1.81837  |
| 53 | H  | -1.30876 | 1.55358  | -1.77195 | 148 | H  | -1.20511 | 2.66944  | 1.975794 |
| 54 | C  | -3.50748 | -1.03032 | -2.10818 | 149 | C  | -4.12554 | 0.931143 | 1.651816 |
| 55 | H  | -2.94048 | -3.05833 | -2.59019 | 150 | H  | -4.22768 | -1.19582 | 1.318874 |
| 56 | H  | -3.71637 | 1.07317  | -1.67958 | 151 | H  | -3.64188 | 3.013954 | 1.971718 |
| 57 | C  | -4.93351 | -1.30031 | -1.92789 | 152 | C  | -5.57455 | 1.117725 | 1.630896 |
| 58 | C  | -5.34529 | -2.47119 | -1.22521 | 153 | C  | -6.41899 | 0.090064 | 2.154253 |
| 59 | C  | -6.6509  | -3.0189  | -1.36249 | 154 | C  | -7.7368  | -0.11127 | 1.657288 |

|    |   |          |          |          |     |   |          |          |          |
|----|---|----------|----------|----------|-----|---|----------|----------|----------|
| 60 | C | -4.48077 | -3.12441 | -0.30311 | 155 | C | -5.9674  | -0.83968 | 3.132234 |
| 61 | C | -7.08077 | -4.07774 | -0.60534 | 156 | C | -8.51002 | -1.17525 | 2.04113  |
| 62 | H | -7.31367 | -2.61994 | -2.12374 | 157 | H | -8.12331 | 0.55746  | 0.89683  |
| 63 | C | -4.89935 | -4.17087 | 0.475249 | 158 | C | -6.73343 | -1.90072 | 3.540194 |
| 64 | H | -3.47257 | -2.75029 | -0.16492 | 159 | H | -5.00114 | -0.68712 | 3.602109 |
| 65 | C | -6.22993 | -4.66958 | 0.373947 | 160 | C | -8.0238  | -2.12948 | 2.97969  |
| 66 | H | -8.07212 | -4.47977 | -0.77633 | 161 | H | -9.48552 | -1.30408 | 1.588611 |
| 67 | H | -4.20962 | -4.6002  | 1.191255 | 162 | H | -6.35106 | -2.56133 | 4.308786 |
| 68 | C | -5.86664 | -0.31554 | -2.38042 | 163 | C | -6.1248  | 2.295281 | 1.032539 |
| 69 | C | -5.56775 | 0.538748 | -3.47587 | 164 | C | -5.47362 | 2.957771 | -0.04177 |
| 70 | C | -7.09396 | -0.07872 | -1.70897 | 165 | C | -7.36908 | 2.834823 | 1.451596 |
| 71 | C | -6.41339 | 1.544786 | -3.86564 | 166 | C | -6.03878 | 4.028854 | -0.68626 |
| 72 | H | -4.66257 | 0.365484 | -4.0494  | 167 | H | -4.52527 | 2.575655 | -0.40333 |
| 73 | C | -7.93282 | 0.948098 | -2.05948 | 168 | C | -7.93744 | 3.920136 | 0.834881 |
| 74 | H | -7.34629 | -0.68191 | -0.84517 | 169 | H | -7.8608  | 2.41175  | 2.321837 |
| 75 | C | -7.61377 | 1.811889 | -3.14557 | 170 | C | -7.30435 | 4.540471 | -0.28022 |
| 76 | H | -6.15474 | 2.140661 | -4.73191 | 171 | H | -5.52068 | 4.466301 | -1.53092 |
| 77 | H | -8.83208 | 1.111279 | -1.47784 | 172 | H | -8.86352 | 4.321511 | 1.227518 |
| 78 | N | -6.65946 | -5.6664  | 1.168381 | 173 | N | -8.75411 | -3.20772 | 3.316747 |
| 79 | N | -8.40763 | 2.849766 | -3.47357 | 174 | N | -7.88059 | 5.574867 | -0.92251 |
| 80 | C | -5.74219 | -6.31972 | 2.085613 | 175 | C | -8.22807 | -4.19514 | 4.241674 |
| 81 | H | -5.33483 | -5.60743 | 2.811367 | 176 | H | -8.12717 | -3.7842  | 5.253422 |
| 82 | H | -6.27927 | -7.09449 | 2.630396 | 177 | H | -8.91099 | -5.04251 | 4.280832 |
| 83 | H | -4.90918 | -6.78796 | 1.549168 | 178 | H | -7.24949 | -4.55802 | 3.913158 |
| 84 | C | -8.02041 | -6.16093 | 1.066787 | 179 | C | -10.1026 | -3.37101 | 2.802445 |
| 85 | H | -8.18541 | -6.69389 | 0.122388 | 180 | H | -10.1051 | -3.43725 | 1.708581 |
| 86 | H | -8.2085  | -6.84925 | 1.889506 | 181 | H | -10.5254 | -4.29133 | 3.202239 |
| 87 | H | -8.74067 | -5.34094 | 1.135812 | 182 | H | -10.7452 | -2.53551 | 3.101817 |
| 88 | C | -9.64244 | 3.090471 | -2.74965 | 183 | C | -9.18679 | 6.058145 | -0.51609 |
| 89 | H | -10.0642 | 4.039655 | -3.07678 | 184 | H | -9.54383 | 6.775513 | -1.25402 |
| 90 | H | -10.379  | 2.299147 | -2.93484 | 185 | H | -9.90757 | 5.236303 | -0.46382 |
| 91 | H | -9.45836 | 3.151318 | -1.67291 | 186 | H | -9.14895 | 6.553848 | 0.461886 |
| 92 | C | -8.10392 | 3.669854 | -4.63287 | 187 | C | -7.16761 | 6.277699 | -1.97282 |
| 93 | H | -8.82395 | 4.485075 | -4.6884  | 188 | H | -7.78906 | 7.094995 | -2.33584 |
| 94 | H | -7.10152 | 4.103467 | -4.55888 | 189 | H | -6.22591 | 6.697964 | -1.60188 |
| 95 | H | -8.164   | 3.088876 | -5.56112 | 190 | H | -6.94454 | 5.61552  | -2.81572 |

## References

- 1 A. Mondal, H. Chen, L. Flämig, P. Wedi, M. van Gemmeren, *J. Am. Chem. Soc.* 2019, **141**, 18662.
- 2 I. Papadopoulos, J. Zirzmeier, C. Hetzer, Y. J. Bae, M. D. Krzyaniak, M. R. Wasielewski, T. Clark, R. R. Tykwinski, D. M. Guldi, *J. Am. Chem. Soc.* 2019, **141**, 6191.
- 3 M. J. T. Frisch, G. W. Schlegel, H. B. Scuseria, M. A. Robb, J. R. Cheeseman, G. Scalmani, V. Barone, B. Mennucci, G. A. Petersson, H. Nakatsuji, M. Caricato, X. Li, H. P. Hratchian, A. F. Izmaylov, J. Bloino, G. Zheng, J. L. Sonnenberg, M. Hada, M. Ehara, K. Toyota, R. Fukuda, J. Hasegawa, M. Ishida, T. Nakajima, Y. Honda, O. Kitao, H. Nakai, T. Vreven, J. A. Montgomery Jr., J. E. Peralta, F. Ogliaro, M. Bearpark, J. J. Heyd, E. Brothers, K. N. Kudin, V. N. Staroverov, T. Keith, R. Kobayashi, J. Normand, K. Raghavachari, A. Rendell, J. C. Burant, S. S. Iyengar, J. Tomasi, M. Cossi, N. Rega, J. M. Millam, M. Klene, J. E. Knox, J. B. Cross, V. Bakken, C. Adamo, J. Jaramillo, R. Gomperts, R. E. Stratmann, O. Yazyev, A. J. Austin, R. Cammi, C. Pomelli, J. W. Ochterski, R. L. Martin, K. Morokuma, V. G. Zakrzewski, G. A. Voth, P. Salvador, J. J. Dannenberg, S. Dapprich, A. D. Daniels, O. Farkas, J. B. Foresman, J. V. Ortiz, J. Cioslowski, D. J. Fox, Gaussian 09, Revision D.01; Gaussian, Inc.: Wallingford, CT, 2013.
- 4 Y. Zhao, D. G. Truhlar, *Theor. Chem. Acc.* 2008, **120**, 215.
- 5 Y. Zhao, D. G. Truhlar, *Acc. Chem. Res.* 2008, **41**, 157.
- 6 A. V. Marenich, C. J. Cramer, D. G. Truhlar, *J. Phys. Chem. B* 2009, **113**, 6378.
- 7 R. Bauernschmitt, R. Ahlrichs, *Chem. Phys. Lett.* 1996, **256**, 454.
- 8 M. E. Casida, C. Jamorski, K. C. Casida, D. R. Salahub, *J. Chem. Phys.* 1998, **108**, 4439.
- 9 R. E. Stratmann, G. E. Scuseria, M. J. Frisch, *J. Chem. Phys.* 1998, **109**, 8218.
- 10 E. R. Johnson, S. Keinan, P. Mori-Sánchez, J. Contreras-García, A. J. Cohen, W. Yang, *J. Am. Chem. Soc.* 2010, **132**, 6498.
- 11 J. Contreras-García, E. R. Johnson, S. Keinan, R. Chaudret, J.-P. Piquemal, D. N. Beratan, W. Yang, *J. Chem. Theory Comput.* 2011, **7**, 625.
- 12 W. Humphrey, A. Dalke, K. Schulten, *J. Mol. Graphics*, 1996, **14**, 33.
- 13 D. Andrae, U. Häußermann, M. Dolg, H. Stoll, H. Preuß, *Theor. Chim. Acta.* 1990, **77**, 123.
- 14 M. Dolg, P. Pyykkö, N. Runeberg, *Inorg. Chem.* 1996, **35**, 7450.
- 15 W. J. Hehre, R. Ditchfield, J. A. Pople, *J. Chem. Phys.* 1972, **56**, 2257.
- 16 P. C. Hariharan, J. A. Pople, *Theor. Chim. Acta.* 1973, **28**, 213.



- 17 J. D. Dill, J. A. Pople, *J. Chem. Phys.* 1975, **62**, 2921.
- 18 Y. Jiang, Y. Wang, N. Ma, Z. Wang, M. Smet, X. Zhang, *Langmuir* 2007, **23**, 4029.
